# Supplementary material for: Elongation of magnetic relaxation times in a single-molecule magnet through intermetallic interactions: a clamshell-type dinuclear terbium(iii)-phthalocynaninato quadruple-decker complex
Source: Royal Society of Chemistry journal article supplement (doi:10.1039/c7cc03553e), 2017-01-01
Supplement: c7cc03553e1.pdf [file c7cc03553e1.pdf]

## **Elongation of Magnetic Relaxation Times in a Single-Molecule Magnet through Intermetallic Interactions: Clamshell-Type Dinuclear Terbium(III)-Phthalocyaninato Quadruple-Decker Complex**

Yoji Horii,<sup>a</sup> Keiichi Katoh,<sup>a\*</sup> Brian. K. Breedlove<sup>a</sup> and Masahiro Yamashita<sup>a,b,c\*</sup>

<sup>a</sup> Department of Chemistry, Graduate School of Science, Tohoku University, 6-3, Aramaki-Aza-Aoba, Aoba-ku, Sendai 980-8578, Japan.

<sup>b</sup> WPI Research Center, Advanced Institute for Materials Research, Tohoku University, 2-1-1 Katahira, Aoba-ku, Sendai 980-8577, Japan.

<sup>c</sup> School of Materials Science and Engineering, Nankai University, Tianjin 300350, China

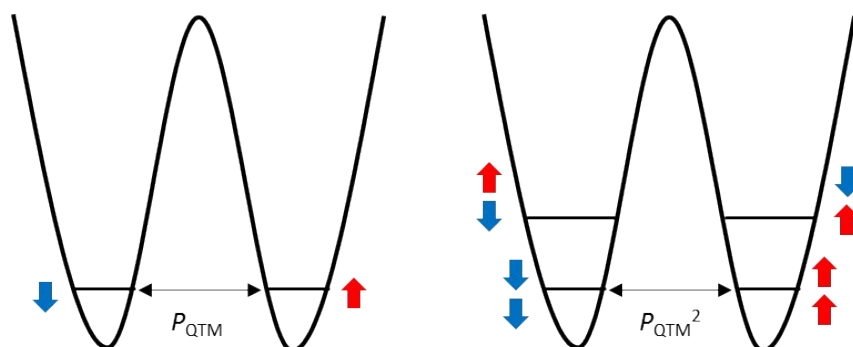

**Figure S1.** Changes in QTM possibility in the double-well potentials of isolated SMM and coupled SMMs. If the possibility for QTM in an isolated SMM is expressed as  $P_{\text{QTM}}$ , the QTM in the coupled SMMs is expressed as  $P_{\text{QTM}}^2$  because simultaneous two spin reversal is required in the latter case. Because  $P_{\text{QTM}}^2$  is smaller than  $P_{\text{QTM}}$ , QTM is effectively suppressed in coupled SMMs.

### Synthesis

Reagents were purchased and used without further purification. 1,2,4-Trichlorobenzene were purchased from Aldrich. Other reagents and the solvents were purchased from Wako. Clamshell type phthalocyanine<sup>1</sup>, phenoxthiin hexachloroantimonate ( $\text{SbCl}_6 \cdot \text{Ox}$ )<sup>2</sup> and  $\text{TbPc}(\text{CH}_3\text{CO}_2)$ <sup>3</sup> were synthesized according to the literature methods.

#### Clamshell type quadruple-decker complex [ $\text{Tb}_2$ ]

In an  $\text{N}_2$  atmosphere, clamshell Pc (74 mg, 0.049 mmol),  $\text{TbPc}(\text{CH}_3\text{CO}_2)$  (70 mg, 0.096 mmol) were mixed with 3 mL of 1,2,4-trichlorobenzene, 1 mL of 1-hexanol and 0.5 mL of 1,8-diazabicyclo[5.4.0]undec-7-ene (DBU). The mixture was refluxed for 2 h in an  $\text{N}_2$  atmosphere. Solvent was evaporated in the vacuum condition. The residue was purified by using chromatography on silica gel (Wakogel c-200) with  $\text{CHCl}_3$  as the eluent. The main green band was collected, and the solvent was evaporated. Further purification of that band by using chromatography on silica gel (Wakogel c-400HG) with  $\text{CHCl}_3$  as the eluent afforded pure [ $\text{Tb}_2$ ]. 42 mg (16%) CHN elemental analysis calcd (%) for  $\text{C}_{160}\text{H}_{118}\text{N}_{32}\text{O}_2\text{Tb}_2$ : C 67.70, H 4.19, N 15.79; found: C 67.41, H 4.52, N 15.64. ESI-MS; 1419.37 [ $\text{M}$ ]<sup>2+</sup> (calcd 1419.94)

#### Cadmium(II)-inserted quadruple-decker complex [ $\text{Tb}_2\text{Cd}$ ]

[ $\text{Tb}_2$ ] (10 mg, 3.5  $\mu\text{mol}$ ) and  $\text{Cd}(\text{CH}_3\text{CO}_2)_2 \cdot 2\text{H}_2\text{O}$  (10 mg, 38  $\mu\text{mol}$ ) were mixed in 1 mL of 1-hexanol and 0.5 mL of 1,2,4-TCB for 30 min in a  $\text{N}_2$  atmosphere. The solvent was removed in the reduced pressure, and the residue was purified by using chromatography over silica gel column chromatography (Wakogel c-400HG). The deep blue fraction was collected and recrystallized from  $\text{CH}_2\text{Cl}_2/\text{CH}_3\text{OH}$  via solvent

diffusion. CHN elemental analysis calcd (%) for  $C_{160}H_{118}N_{16}Tb_2Cd$ : C 65.21, H 4.03, N 15.19; found: C 64.97, H 4.05, N 15.14. ESI-MS; 1476.32  $[M]^{2+}$  (calcd 1476.39)

#### **Mononuclear terbium (III) complex [Tb]**

$H_2(tertPc)$  (48 mg, 0.065 mmol),  $TbPc(CH_3CO_2)$  (48 mg, 0.066 mmol) were mixed with 3 mL of 1,2,4-trichlorobenzene, 2 mL of 1-hexanol and 0.1 mL of DBU in an  $N_2$  atmosphere. The mixture was refluxed for 2 h in an  $N_2$  atmosphere. The solvent was evaporated in vacuo. Residue was purified by using chromatography over silica gel (Wakogel c-200) with  $CHCl_3$  as the eluent. The main green band was collected, and the solvent was evaporated. Further purification of that band by using chromatography on silica gel (Wakogel c-400HG) with  $CHCl_3$  as the eluent afforded pure [Tb]. 29 mg (31%) CHN elemental analysis calcd (%) for  $C_{80}H_{64}N_{16}Tb$ : C 68.22, H 4.58, N 15.91; found: C 68.18, H 4.82, N 15.68. ESI-MS; 1408.48  $[M]^+$  (calcd 1408.47)

#### **Mononuclear yttrium (III) complex [Y]**

$H_2(tertPc)$  (150 mg, 0.065 mmol),  $YPc(CH_3CO_2)$  (150 mg, 0.066 mmol) were mixed with 9 mL of 1,2,4-trichlorobenzene, 6 mL of 1-hexanol and 0.5 mL of DBU in an  $N_2$  atmosphere. The following procedure is same with that of [Tb]. 155 mg (51%) CHN elemental analysis calcd (%) for  $C_{80}H_{64}N_{16}Y$ : C 71.79, H 4.82, N 16.74; found: C 71.49, H 4.90, N 16.77. ESI-MS; 1338.47  $[M]^+$  (calcd 1338.46)

#### **Preparation of magnetically diluted sample $[Tb_2]^{2+*}$**

$[Tb_2]$  (5.27 mg, 1.56 mmol), [Y] (48.50 mg, 35.90 mmol) were mixed in 10 mL of  $CH_2Cl_2$  by using ultrasonic for 1 h. Phenoxathiin hexachloroantimonate  $SbCl_6 \cdot Ox$  31.22 mg (58.38 mmol) were mixed in  $CH_2Cl_2$  by using ultrasonication. Addition of an excess amount of hexane afforded a powder sample of diluted  $[Tb_2]^{2+}$ . Completion of the oxidation reaction was confirmed via UV-Vis-NIR spectrum (Figure S25).

#### **Preparation of magnetically diluted sample $[Tb]^{+*}$**

[Tb] (5.69 mg, 4.04 mmol), [Y] (49.54 mg, 37.01 mmol) were mixed in 10 mL of  $CH_2Cl_2$  by using ultrasonication for 1 h. Phenoxathiin hexachloroantimonate  $SbCl_6 \cdot Ox$  (32.92 mg, 61.56 mmol) were mixed in  $CH_2Cl_2$  by using ultrasonication. Addition of an excess amount of hexane afforded a powder sample of diluted  $[Tb]^+$ . Completion of the oxidation reaction was confirmed via UV-Vis-NIR spectrum (Figure S25).

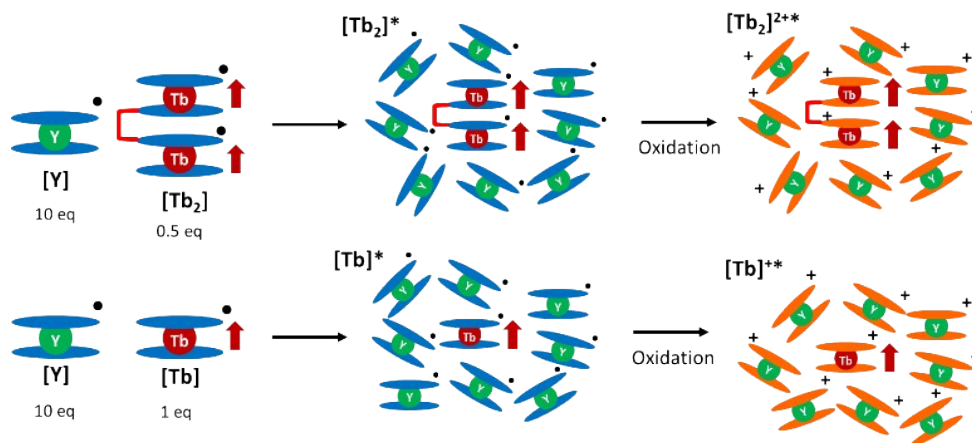

**Figure S2.** Preparation of magnetically diluted samples. To avoid the intermolecular magnetic interactions and extract the effects of intramolecular Tb–Tb interactions, we prepared magnetically diluted samples ( $[\text{Tb}_2]^*$  and  $[\text{Tb}]^*$ ) by doping the Tb(III) complexes into excess amount of [Y]. Because  $[\text{Tb}_2]$ , [Tb] and [Y] have  $\pi$ -radicals on the pthalocyaninato ligands, and it is known that these  $\pi$ -radical induce the intermolecular magnetic interactions,<sup>4</sup> oxidizer (phenoxathiin hexachloroantimonate:<sup>2</sup>  $\text{SbCl}_6\text{-Ox}$ ) was added to  $[\text{Tb}_2]^*$  and  $[\text{Tb}]^*$  to quench the radicals as well as the intermolecular magnetic interactions.

### Generalized Debye model equations

For fitting ac magnetic susceptibilities, generalized Debye model equations were used.

$$\chi_M' = \chi_S + (\chi_T - \chi_S) \frac{(2\pi\nu\tau)^{1-\alpha} \sin\left(\frac{\pi\alpha}{2}\right)}{1 + 2(2\pi\nu\tau)^{1-\alpha} \sin\left(\frac{\pi\alpha}{2}\right) + (2\pi\nu\tau)^{2-2\alpha}} \quad \text{eq. S1 (a)}$$

$$\chi_M'' = (\chi_T - \chi_S) \frac{(2\pi\nu\tau)^{1-\alpha} \cos\left(\frac{\pi\alpha}{2}\right)}{1 + 2(2\pi\nu\tau)^{1-\alpha} \sin\left(\frac{\pi\alpha}{2}\right) + (2\pi\nu\tau)^{2-2\alpha}} \quad \text{eq. S1 (b)}$$

In these equations,  $\chi_s$  and  $\chi_T$  are adiabatic and isotherm magnetic susceptibility, respectively,  $\nu$  is ac frequency of magnetic field,  $\tau$  is magnetic relaxation time, and  $\alpha$  is deviation factor. Both real ( $\chi_M'$ ) and imaginary ( $\chi_M''$ ) parts of ac susceptibilities were fitted simultaneously to get  $\tau$ .

### Derivation of equation 1.

Activation energy for spin reversal in a TbPc<sub>2</sub> unit is ca. 500 cm<sup>-1</sup>. Therefore, in the low temperature region, the ground states of the TbPc<sub>2</sub> units are |±6>. When two |±6> states are coupled together, ferromagnetic |±6, ±6> and antiferromagnetic |±6, ∓6> states are generated. In the case of [Tb<sub>2</sub>]<sup>2+\*</sup>, it is expected that the |±6, ±6> states are more stable than the |±6, ∓6> states are due to the increase in χ<sub>M</sub>T values in the low temperature regions. If the energy gap between the |±6, ±6> and |±6, ∓6> states is ΔV<sub>dip</sub>, the axial component of χ<sub>M</sub>T is written as follows according to the Van Vleck equation.

$$\chi_{Mz}T = N_A \frac{(2g\mu_B J_z)^2}{k_B} \frac{1}{\exp\left(-\frac{\Delta V_{dip}}{k_B T}\right) + 1} \quad \text{eq. S2}$$

By subtracting the χ<sub>M</sub>T value at infinite temperature (N<sub>A</sub>(2gμ<sub>B</sub>J<sub>z</sub>)/2k<sub>B</sub>), Δχ<sub>Mz</sub>T was obtained.

$$\Delta\chi_{Mz}T = N_A \frac{(2g\mu_B J_z)^2}{k_B} \frac{1}{\exp\left(-\frac{\Delta V_{dip}}{k_B T}\right) + 1} - N_A \frac{(2g\mu_B J_z)^2}{2k_B} \quad \text{eq. S3}$$

Since equation does not contain the effects of ligand field splitting, we can estimate ΔV<sub>dip</sub> without considering ligand field splitting. The increase in χ<sub>M</sub>T value at low temperature mainly originates from the axial component of Δχ<sub>M</sub>T. Therefore, Δχ<sub>M</sub>T ≈ Δχ<sub>Mz</sub>T/3 is established.

$$\Delta\chi_M T \cong \Delta\chi_{Mz} T / 3 = N_A \frac{(2g\mu_B J_z)^2}{3k_B} \frac{1}{\exp\left(-\frac{\Delta V_{dip}}{k_B T}\right) + 1} - N_A \frac{(2g\mu_B J_z)^2}{6k_B} \quad \text{eq. S4}$$

#### Estimation of the Tb–Tb distance from the magnitude of ΔV<sub>dip</sub>

Hamiltonian for magnetic dipole-dipole (MD) interactions between dipole<sub>1</sub> and dipole<sub>2</sub> is expressed as eq. S5.

$$V_{dip} = \frac{\mu_0 (g\mu_B)^2}{4\pi R^3} \{J^{(1)} \cdot J^{(2)} - 3(J^{(1)} \cdot e)(J^{(2)} \cdot e)\} \quad \text{eq. S5}$$

where μ<sub>0</sub> is magnetic permeability, μ<sub>B</sub> is Bohr magneton, g is Lande g-factor, **J**<sup>(1)</sup> and **J**<sup>(2)</sup> are angular momentums, R is the distance between **J**<sup>(1)</sup> and **J**<sup>(2)</sup>, and **e** is the unit vector which connect **J**<sup>(1)</sup> and **J**<sup>(2)</sup>. If the magnetic easy axes of the TbPc<sub>2</sub> units are on the same line, eq. S5 becomes simpler due to the absence of perpendicular component of MD interactions:

$$V_{dip} = \frac{\mu_0 (g\mu_B)^2}{4\pi R^3} \left\{ \frac{1}{2}(J_+^{(1)} \cdot J_-^{(2)} + J_-^{(1)} \cdot J_+^{(2)}) - 2J_z^{(1)} \cdot J_z^{(2)} \right\} \quad \text{eq. S6}$$

where  $J_{\pm}$  and  $J_z$  are lift operators and z component of  $\mathbf{J}$ . When considering the  $|\pm 6, \pm 6\rangle$  and  $|\pm 6, \mp 6\rangle$  states as the ground states, matrix elements can be derived from eq. S5 as follows:

|                          |                                      |                                     |
|--------------------------|--------------------------------------|-------------------------------------|
|                          | $ \pm 6, \pm 6\rangle$               | $ \pm 6, \mp 6\rangle$              |
| $\langle \pm 6, \pm 6  $ | $\frac{-18\mu_0(g\mu_B)^2}{\pi R^3}$ |                                     |
| $\langle \pm 6, \mp 6  $ |                                      | $\frac{18\mu_0(g\mu_B)^2}{\pi R^3}$ |

Therefore, the energy gap between the  $|\pm 6, \pm 6\rangle$  and  $|\pm 6, \mp 6\rangle$  states ( $\Delta V_{dip}$ ) is as follows:

$$\Delta V_{dip} = \frac{36\mu_0(g\mu_B)^2}{\pi R^3} \quad \text{eq. S7}$$

By using eq. S7 and  $\Delta V_{dip} = 0.646 \text{ cm}^{-1}$ ,  $R$  was estimated to be  $6.01 \text{ \AA}$ .

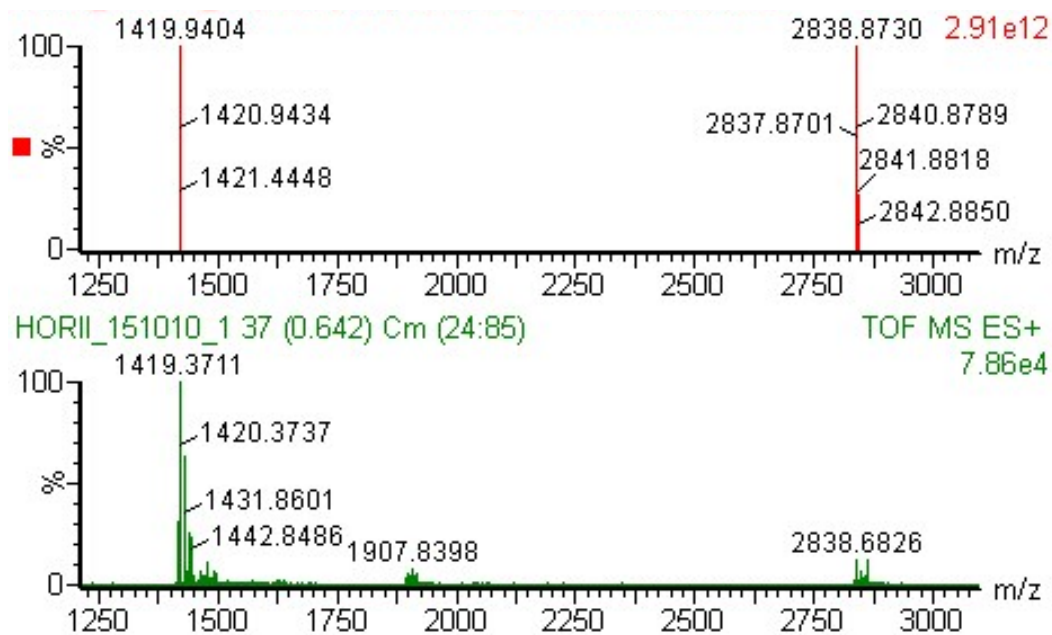

**Figure S3.** Experimental (below) and calculated (above) ESI mass spectra for  $[Tb_2]$ .

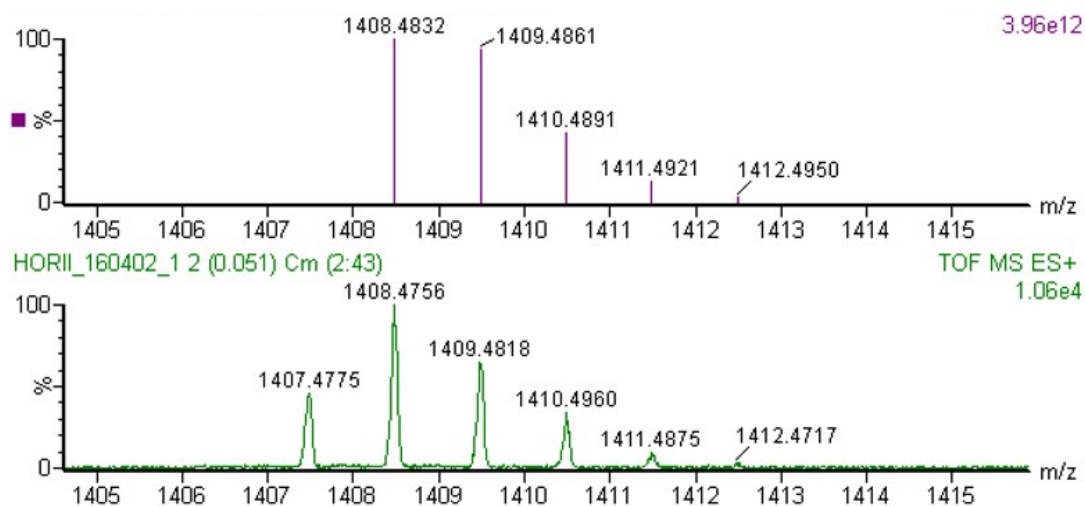

**Figure S4.** Experimental (below) and calculated (above) ESI mass spectra for  $[Tb]$ .

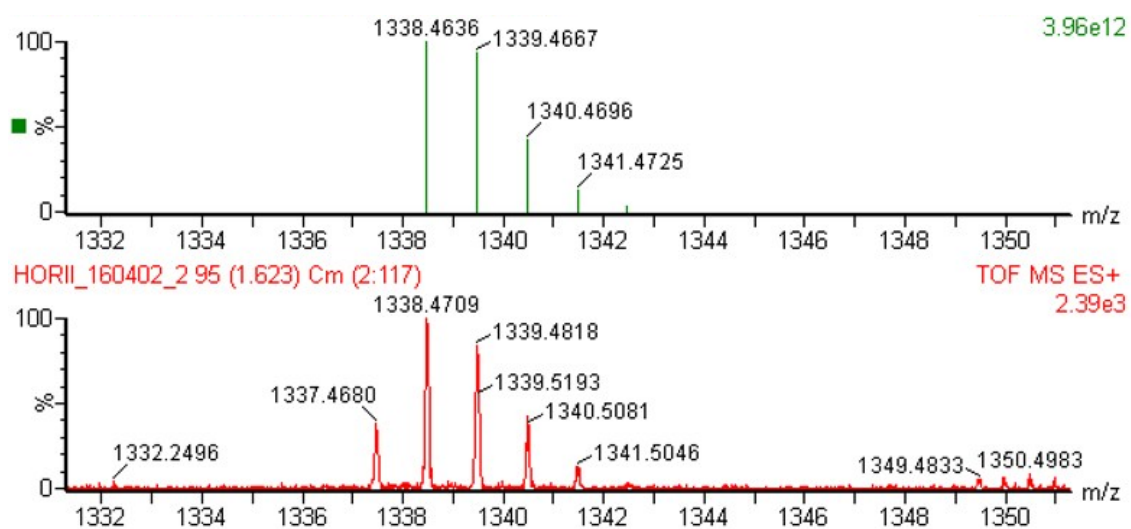

**Figure S5.** Experimental (below) and calculated (above) isotope pattern for [Y] shown in ESI mass spectrum.

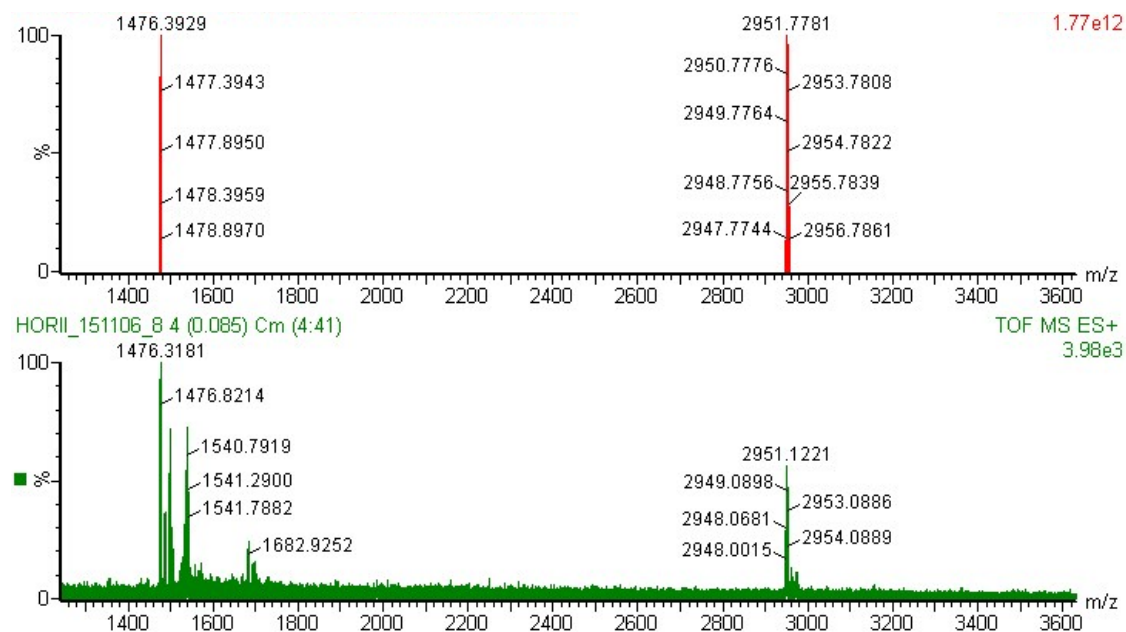

**Figure S6.** Experimental (below) and calculated (above) ESI mass spectra for [Tb<sub>2</sub>Cd].



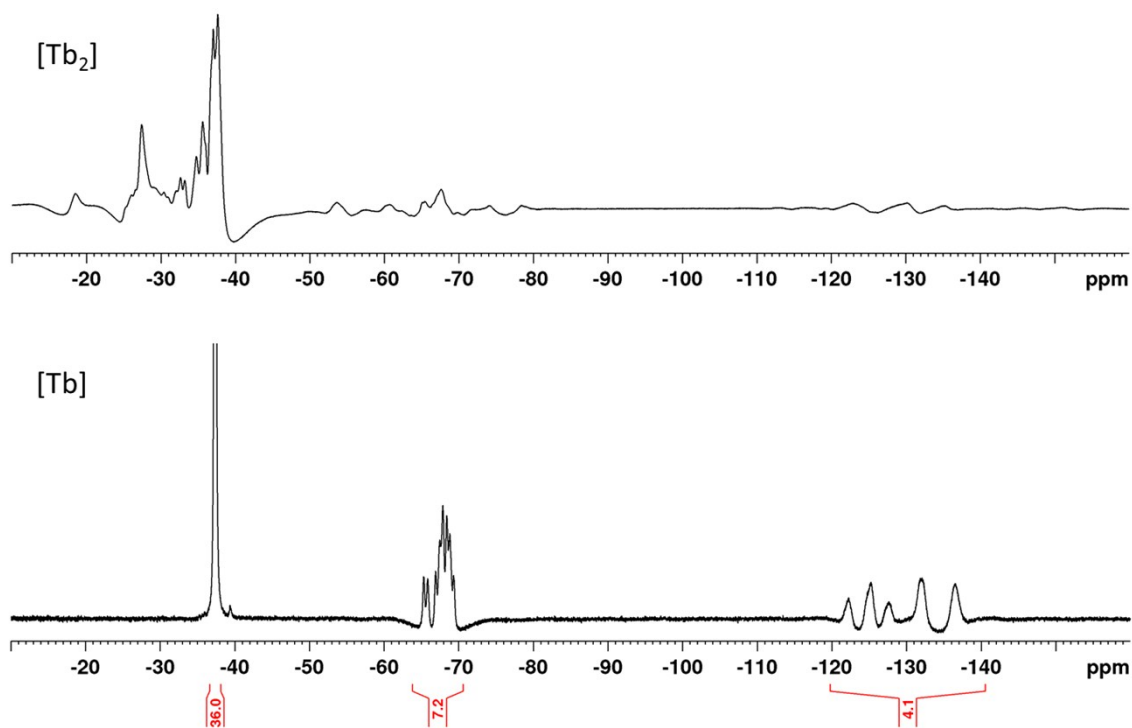

**Figure S7.**  $^1\text{H}$  NMR spectra for  $[\text{Tb}_2]$  and  $[\text{Tb}]$  dissolved in  $\text{CD}_2\text{Cl}_2$ . Paramagnetic behaviors and low molecular symmetries of  $[\text{Tb}_2]$  and  $[\text{Tb}]$  make it difficult to obtain sharp NMR spectra. It is especially difficult to assign the spectra for  $[\text{Tb}_2]$ . In contrast, the  $^1\text{H}$  NMR spectra for  $[\text{Tb}]$  are relatively sharper. The signal at  $-37.36$  ppm originates from tertiary butyl group in  $[\text{Tb}]$ .

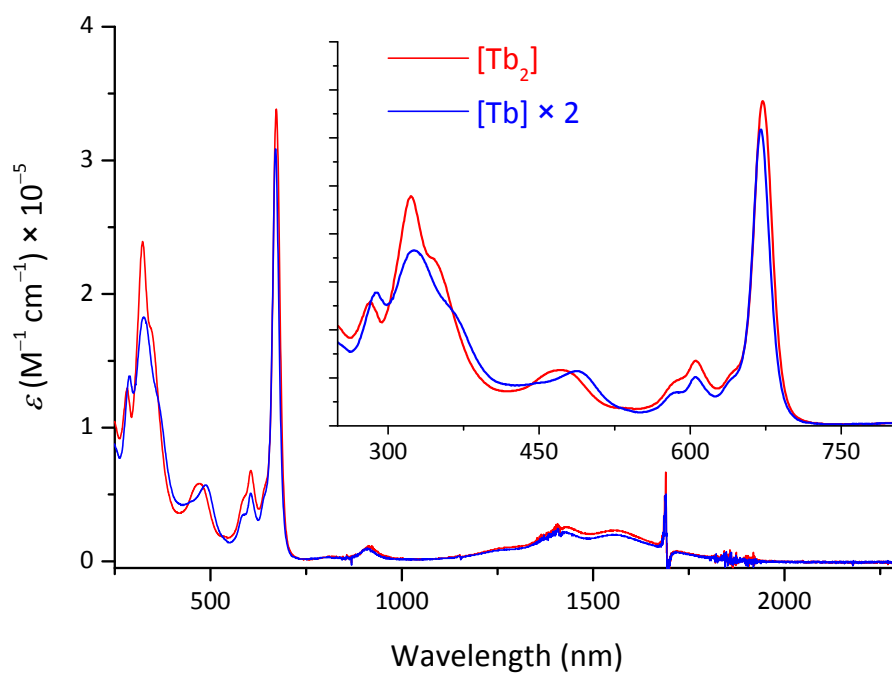

**Figure S8.** UV-Vis-NIR spectrum of  $[Tb_2]$  and  $[Tb]$ .

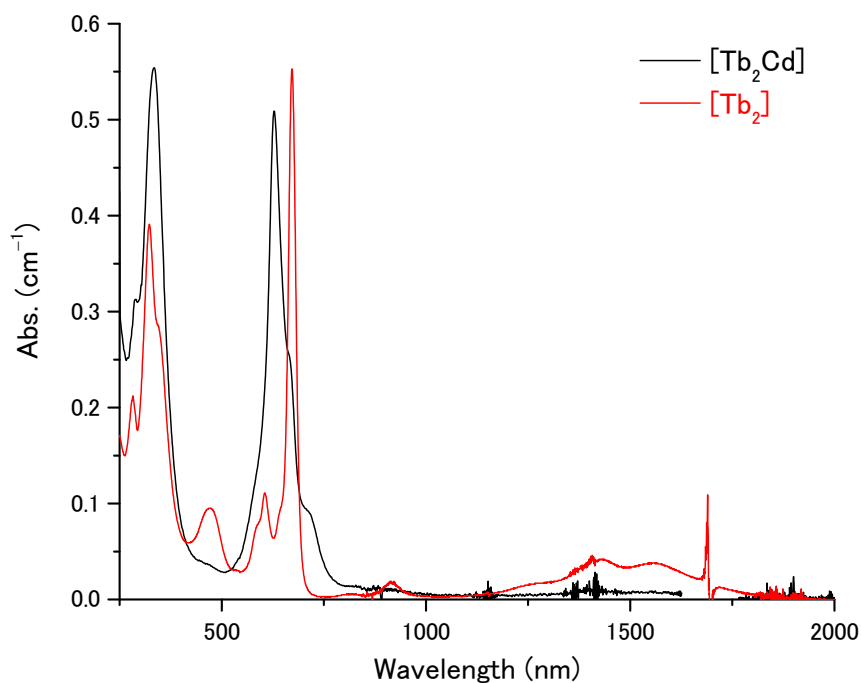

**Figure S9.** UV-Vis-NIR spectrum of  $[Tb_2]$  and  $[Tb_2Cd]$ . Absence of the broad NIR band indicates the absence of a  $\pi$ -radical in  $[Tb_2Cd]$ .

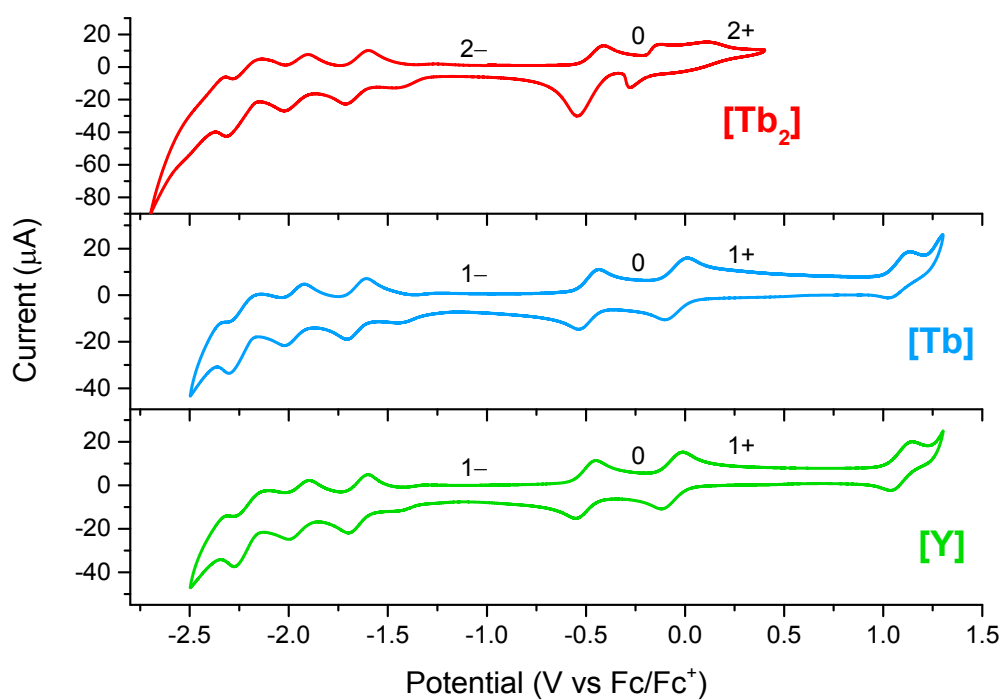

**Figure S10.** Cyclic voltammogram (CV) of [Tb<sub>2</sub>], [Tb] and [Y].

**Table S1.** Redox potentials obtained from the DPV measurements (V vs Fc/Fc<sup>+</sup>). Ox2 corresponds to the potentials for LnPc<sub>2</sub>/LnPc<sub>2</sub><sup>+</sup>

|                    | Red3   | Red2   | Red1   | Ox1    | Ox2           | Ox3   |
|--------------------|--------|--------|--------|--------|---------------|-------|
| [Tb <sub>2</sub> ] | -2.225 | -1.960 | -1.654 | -0.206 | <b>-0.477</b> |       |
| [Tb]               | -2.226 | -1.970 | -1.658 | -0.484 | <b>-0.047</b> | 1.081 |
| [Y]                | -2.197 | -1.940 | -1.647 | -0.499 | <b>-0.061</b> | 1.094 |

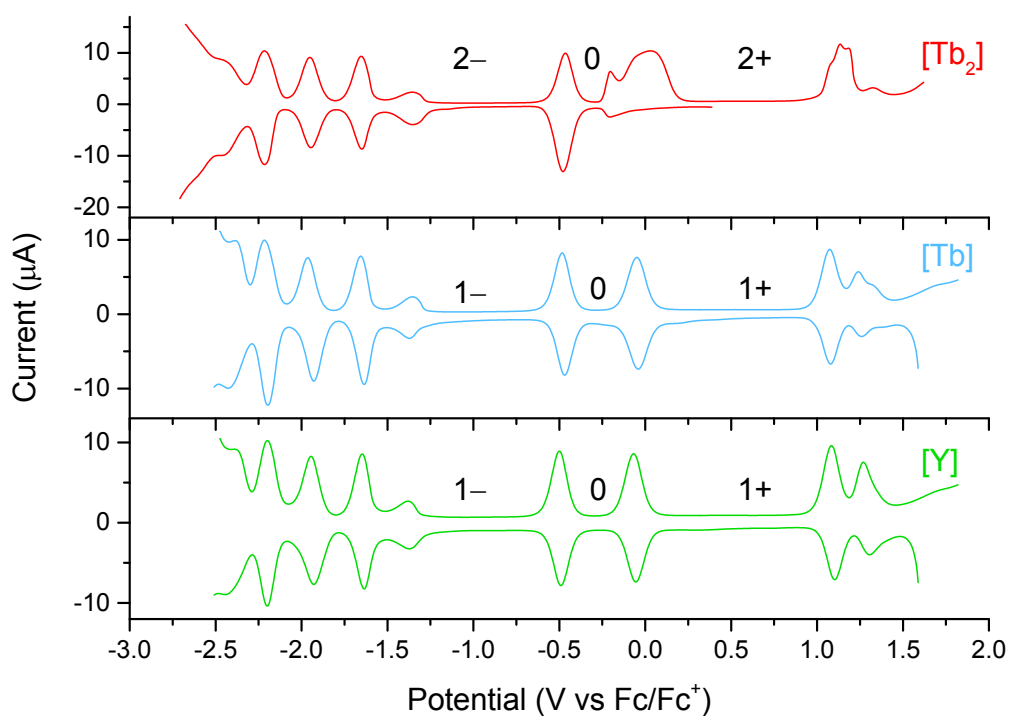

**Figure S11.** Differential pulse voltammetry (DPV) of [Tb<sub>2</sub>], [Tb] and [Y].

**Table S2.** Redox potentials obtained from the DPV measurements (V vs Fc/Fc<sup>+</sup>). Ox2 correspond to the potentials for LnPc<sub>2</sub>/LnPc<sub>2</sub><sup>+</sup>

|                    | Red3   | Red2   | Red1   | Ox1    | <b>Ox2</b>    | Ox3   | Ox4   |
|--------------------|--------|--------|--------|--------|---------------|-------|-------|
| [Tb <sub>2</sub> ] | -2.212 | -1.948 | -1.652 | -0.464 | <b>-0.204</b> | 1.136 | 1.180 |
| [Tb]               | -2.216 | -1.964 | -1.656 | -0.484 | <b>-0.048</b> | 1.072 | 1.240 |
| [Y]                | -2.200 | -1.944 | -1.648 | -0.500 | <b>-0.068</b> | 1.084 | 1.268 |

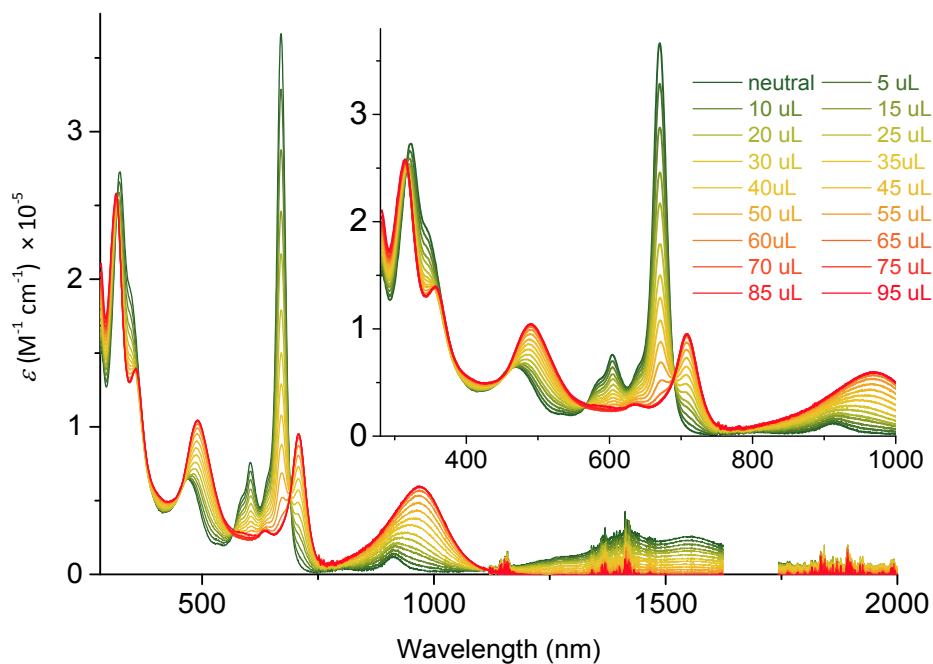

**Figure S12.** Changes in the UV-Vis-NIR spectrum upon the addition of  $\text{SbCl}_6\text{-Ox}$  solution (0.319 mM) to  $[\text{Tb}_2]$  in  $\text{CH}_2\text{Cl}_2$ . Observation of isosbestic points indicate no decomposition of  $[\text{Tb}_2]$  during the oxidation reactions.

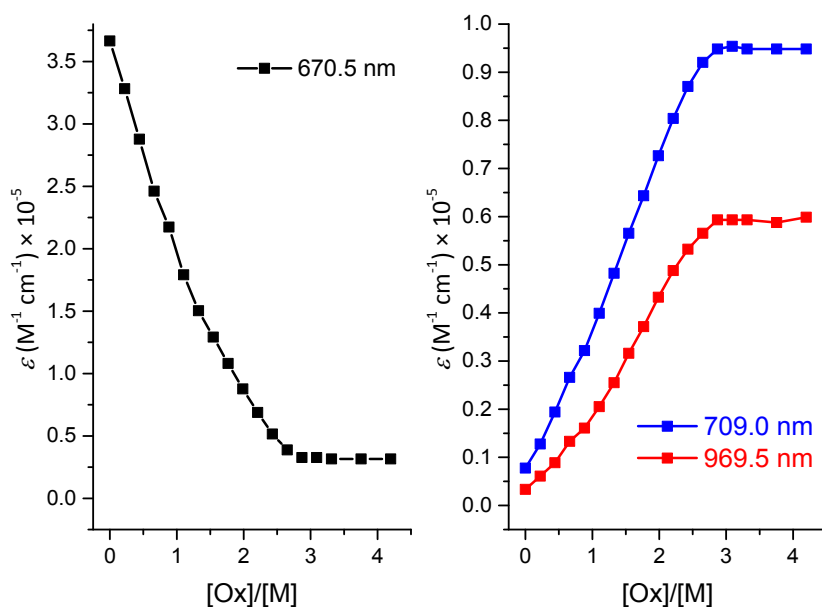

**Figure S13.** Changes in molar absorption coefficient  $\varepsilon$  ( $\text{M}^{-1} \text{cm}^{-1}$ ) of  $[\text{Tb}]$  during oxidative titration.  $\varepsilon$  became constant above 2.5  $[\text{Ox}]/[\text{M}]$ , meaning that 2.5 equivalent of  $\text{SbCl}_6\text{-Ox}$  is required for complete conversion of  $[\text{Tb}_2]$  into  $[\text{Tb}_2]^{2+}$ .

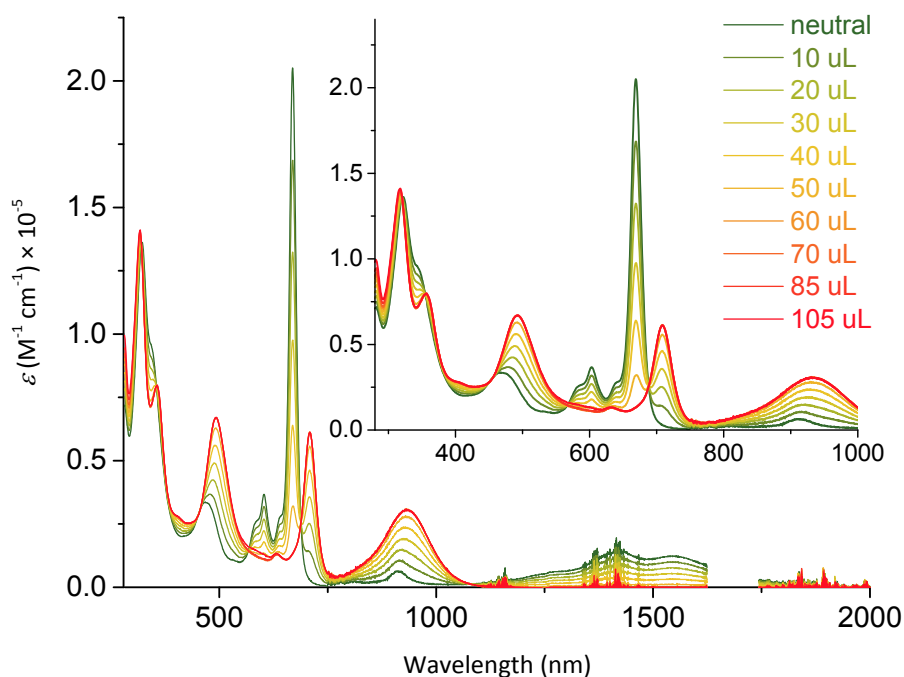

**Figure S14.** Changes in UV-Vis-NIR spectrum upon addition of  $\text{SbCl}_6\text{-Ox}$  solution (0.319 mM) to  $[\text{Tb}]$  in  $\text{CH}_2\text{Cl}_2$ . Observation of the isosbestic points indicate no decomposition of  $[\text{Tb}]$  during the oxidation reactions.

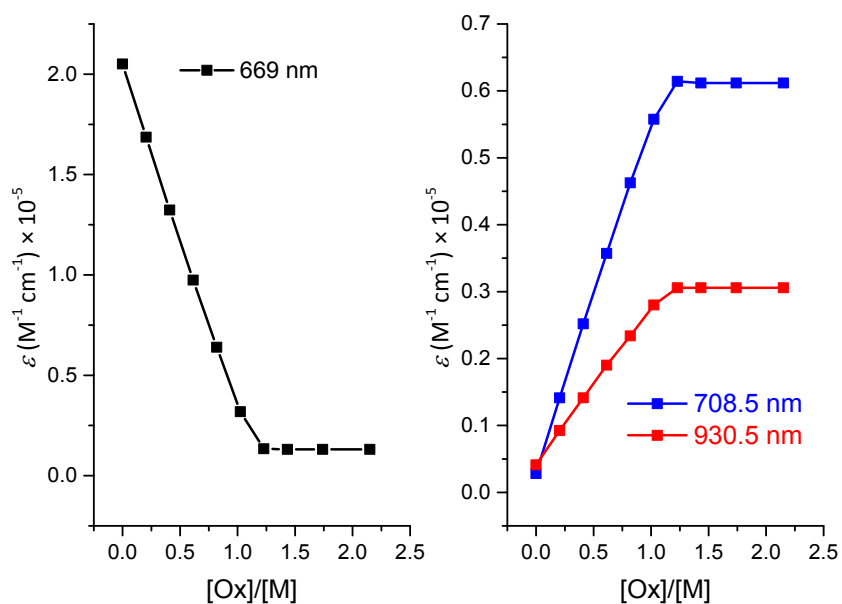

**Figure S15.** Changes in molar absorption coefficient  $\varepsilon$  ( $\text{M}^{-1} \text{cm}^{-1}$ ) of  $[\text{Tb}]$  during oxidative titration.  $\varepsilon$  became constant above 1.25  $[\text{Ox}]/[\text{M}]$ , meaning that 1.25 equivalent of  $\text{SbCl}_6\text{-Ox}$  is required for complete conversion of  $[\text{Tb}]$  into  $[\text{Tb}]^+$ .

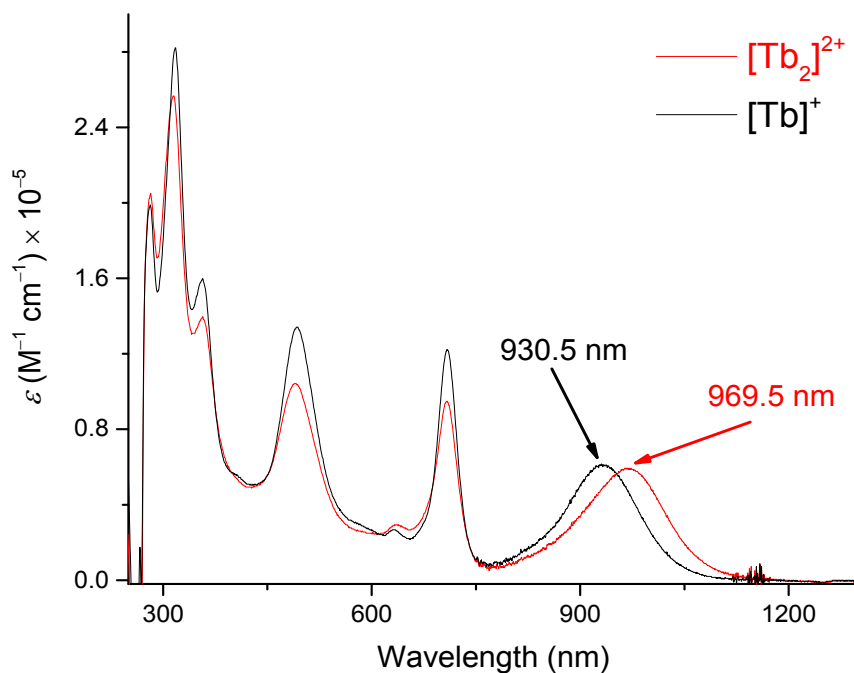

**Figure S16.** UV-Vis-NIR spectrum of  $[\text{Tb}_2]^{2+}$  and  $[\text{Tb}]^+$  in  $\text{CH}_2\text{Cl}_2$

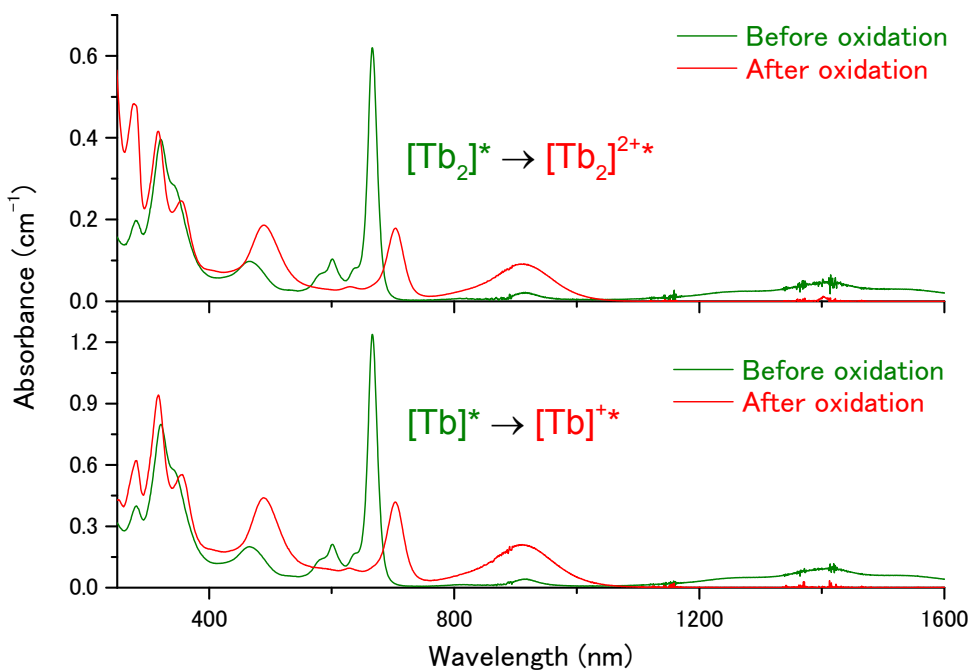

**Figure S17.** Changes in UV-Vis-NIR spectrum before and after oxidation of  $[\text{Tb}_2]^*$  and  $[\text{Tb}]^*$  in  $\text{CH}_2\text{Cl}_2$ .

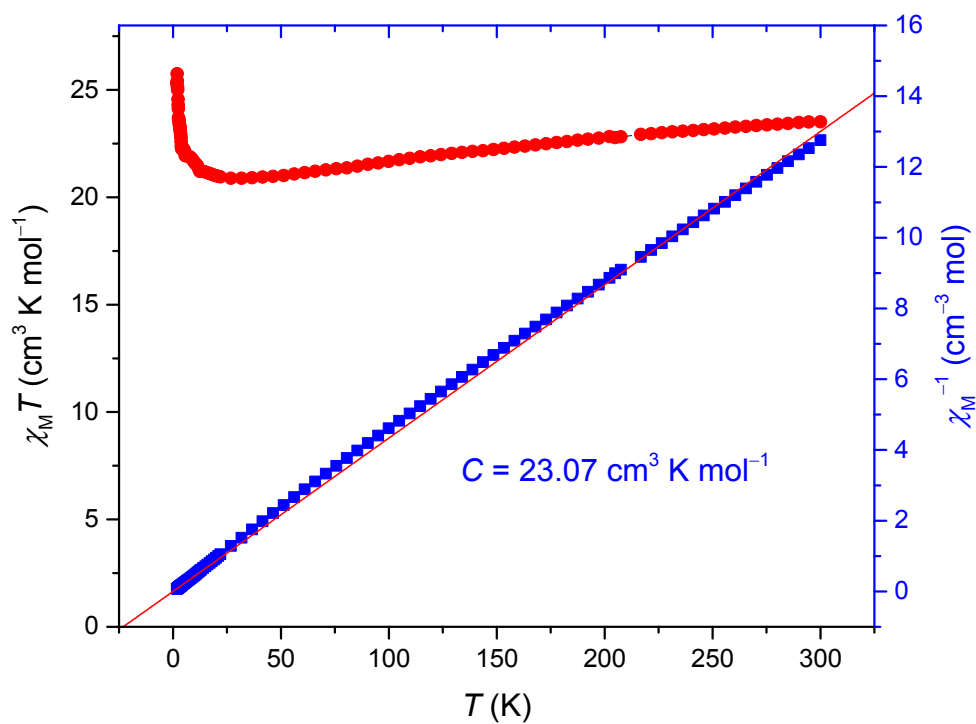

**Figure S18.**  $\chi_M T$  vs  $T$  and  $\chi_M^{-1}$  vs  $T$  plots for  $[\text{Tb}_2]$  in a 1000 Oe dc magnetic field. Solid line on the  $\chi_M^{-1}$  vs  $T$  plots was fitted using the Curie equation for  $T > 150$  K



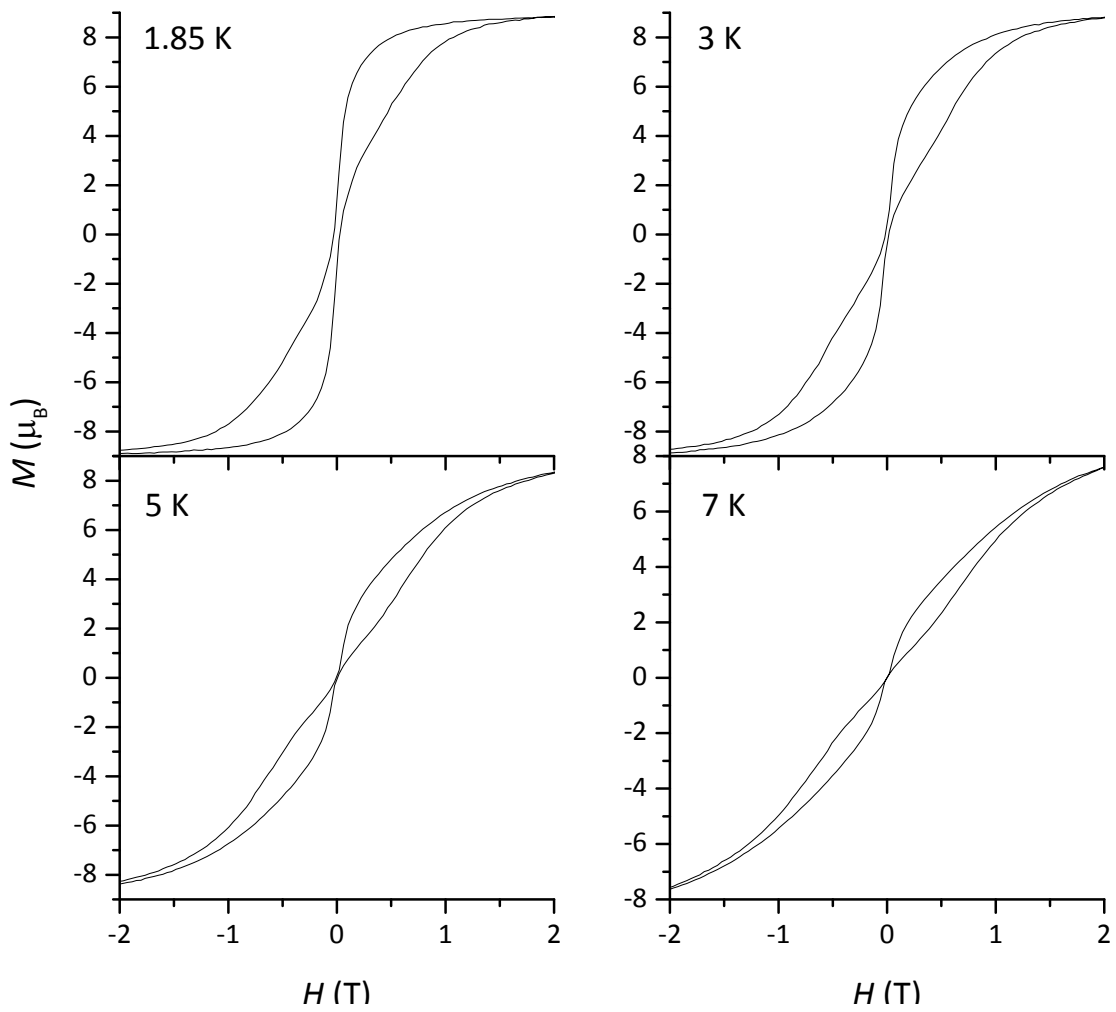

**Figure S19.** *MH* curves for [Tb<sub>2</sub>] at a field sweep rate of 15 Oe/s.

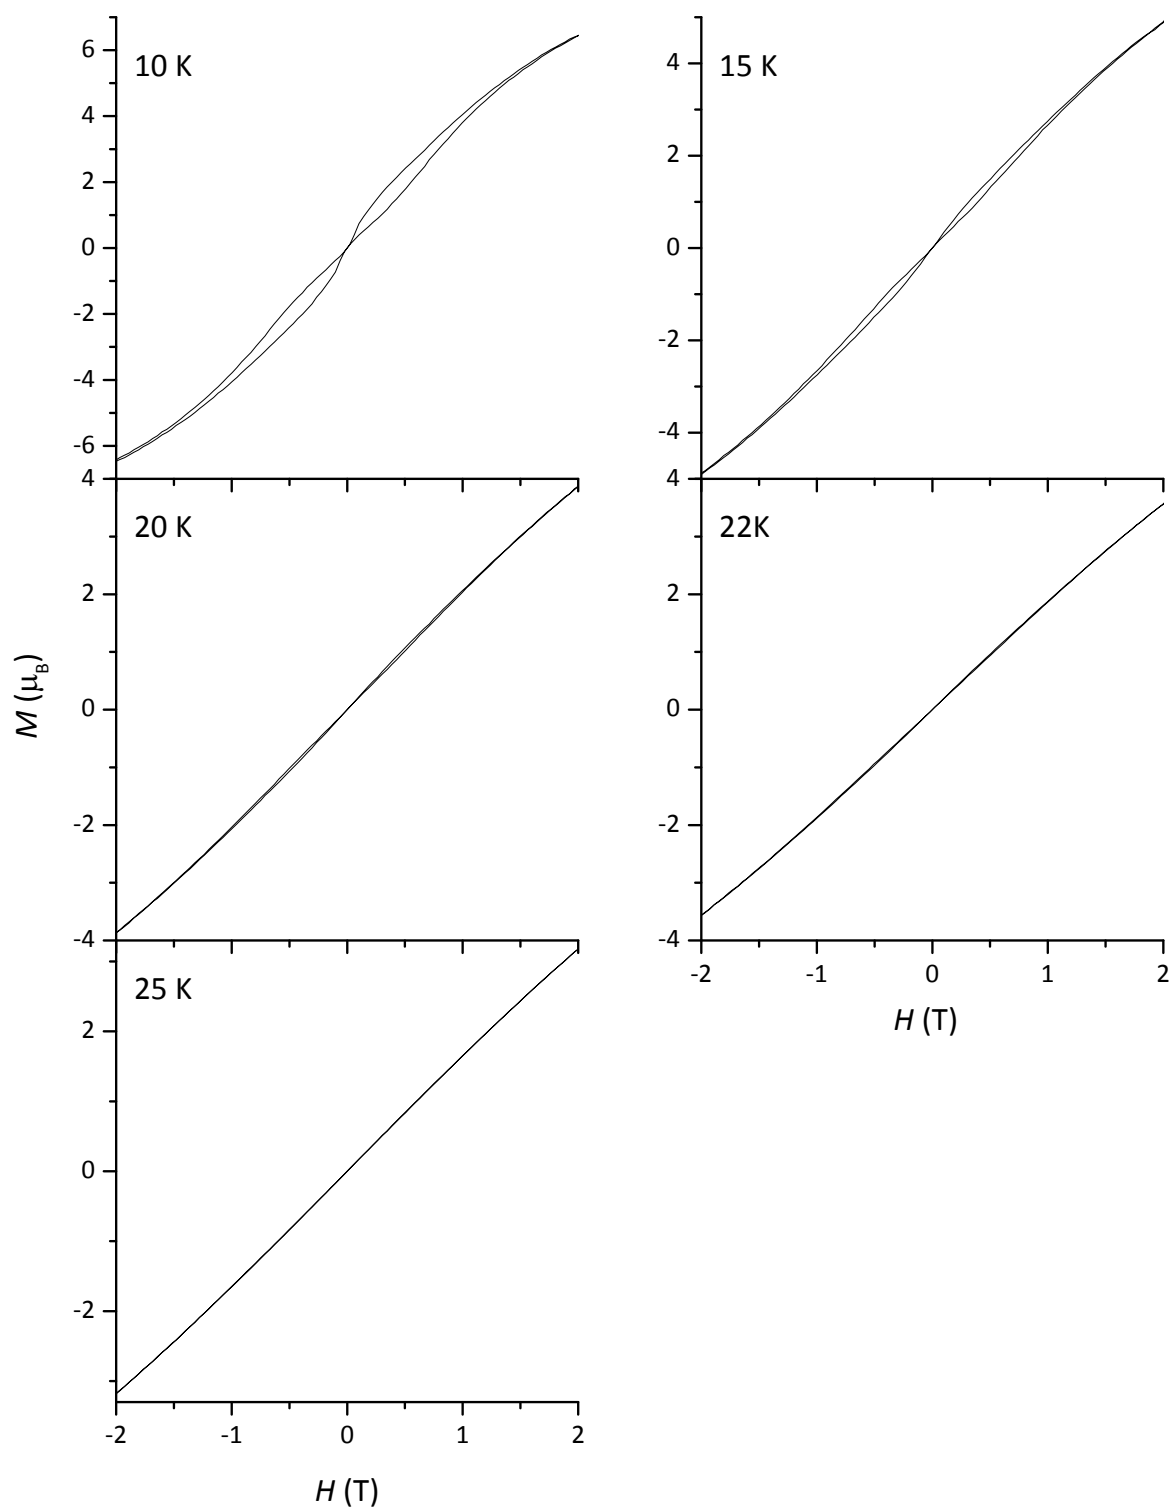

**Figure S20.** *MH* curves for [Tb<sub>2</sub>] at a field sweep rate of 15 Oe/s.

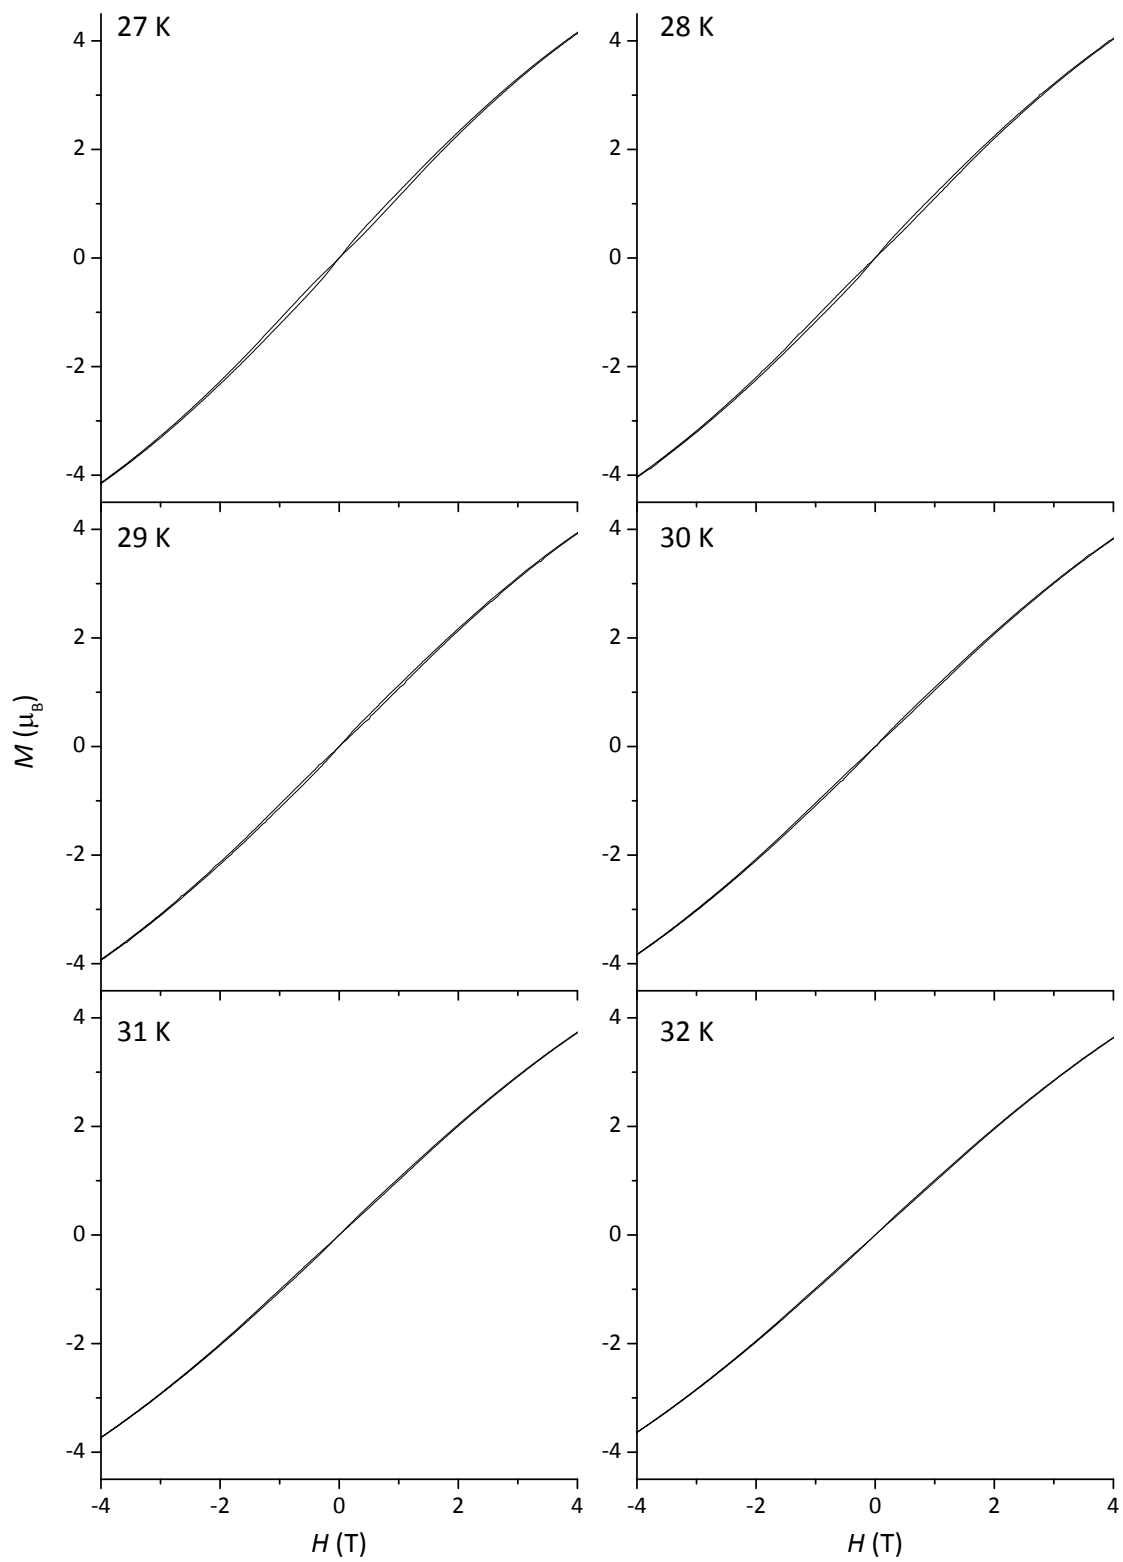

**Figure S21.** *MH* curves for  $[Tb_2]$  at a field sweep rate of 200 Oe/s.

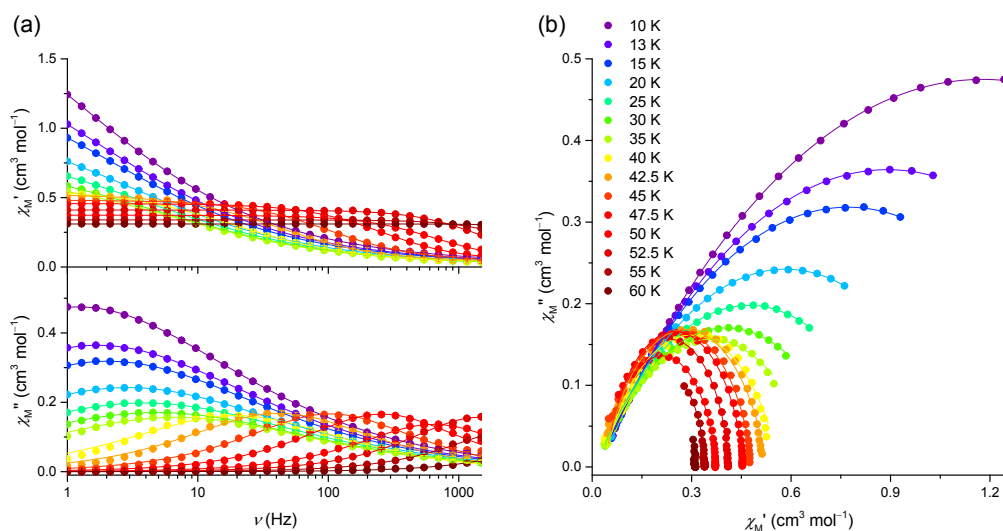

**Figure S22.** (a)  $\chi_M'$  vs  $\nu$  and  $\chi_M''$  vs  $\nu$  plots (b) Cole-Cole plots for  $[\text{Tb}_2]$  without an applied dc magnetic field. Solid lines were fitted using the Debye model.

**Table S3.** Fitting parameter obtained from Figure S22.

| $T$ (K) | $\chi_s$ ( $\text{cm}^3 \text{mol}^{-1}$ ) | $\text{dev}(\chi_s)$ | $\chi_\tau$ ( $\text{cm}^3 \text{mol}^{-1}$ ) | $\text{dev}(\chi_\tau)$ | $\tau$ (s) | $\text{dev}(\tau)$ | $\alpha$ | $\text{dev}(\alpha)$ |
|---------|--------------------------------------------|----------------------|-----------------------------------------------|-------------------------|------------|--------------------|----------|----------------------|
| 10      | 0.02019                                    | 6.91593E-4           | 2.33528                                       | 0.0066                  | 0.13105    | 0.00126            | 0.50433  | 9.33467E-4           |
| 13      | 0.01853                                    | 6.98687E-4           | 1.76282                                       | 0.00523                 | 0.09327    | 9.32524E-4         | 0.49629  | 0.00113              |
| 15      | 0.01813                                    | 6.46928E-4           | 1.52469                                       | 0.00426                 | 0.0776     | 7.23471E-4         | 0.49106  | 0.00115              |
| 20      | 0.01213                                    | 7.30915E-4           | 1.15344                                       | 0.00377                 | 0.05496    | 5.94595E-4         | 0.48877  | 0.00152              |
| 25      | 0.00982                                    | 8.02018E-4           | 0.93583                                       | 0.00338                 | 0.04101    | 4.86197E-4         | 0.48548  | 0.00188              |
| 30      | 0.01021                                    | 9.10486E-4           | 0.79926                                       | 0.0033                  | 0.03277    | 4.40508E-4         | 0.481    | 0.00234              |
| 35      | 0.01623                                    | 0.00169              | 0.69043                                       | 0.00488                 | 0.02313    | 5.08648E-4         | 0.44705  | 0.00483              |
| 40      | 0.03191                                    | 0.00292              | 0.56649                                       | 0.00426                 | 0.00814    | 1.91181E-4         | 0.30743  | 0.00915              |
| 42.5    | 0.03588                                    | 0.00275              | 0.52707                                       | 0.00262                 | 0.00374    | 6.71167E-5         | 0.23513  | 0.00815              |
| 45      | 0.03872                                    | 0.00259              | 0.48341                                       | 0.00158                 | 0.00154    | 2.21418E-5         | 0.18155  | 0.00701              |
| 47.5    | 0.04271                                    | 0.00226              | 0.45743                                       | 8.39632E-4              | 6.16728E-4 | 6.54056E-6         | 0.14148  | 0.00516              |
| 50      | 0.04719                                    | 0.00269              | 0.37366                                       | 5.11067E-4              | 2.47702E-4 | 3.32544E-6         | 0.11524  | 0.00552              |
| 52.5    | 0.06116                                    | 0.00441              | 0.41058                                       | 3.64938E-4              | 1.1256E-4  | 2.06112E-6         | 0.07098  | 0.00556              |
| 55      | 0.08339                                    | 0.00819              | 0.33929                                       | 2.53869E-4              | 5.84189E-5 | 2.55548E-6         | 0.04643  | 0.00858              |
| 60      | 0                                          | 0.17342              | 0.31033                                       | 2.26556E-4              | 1.0729E-5  | 7.01628E-6         | 0.02784  | 0.03063              |

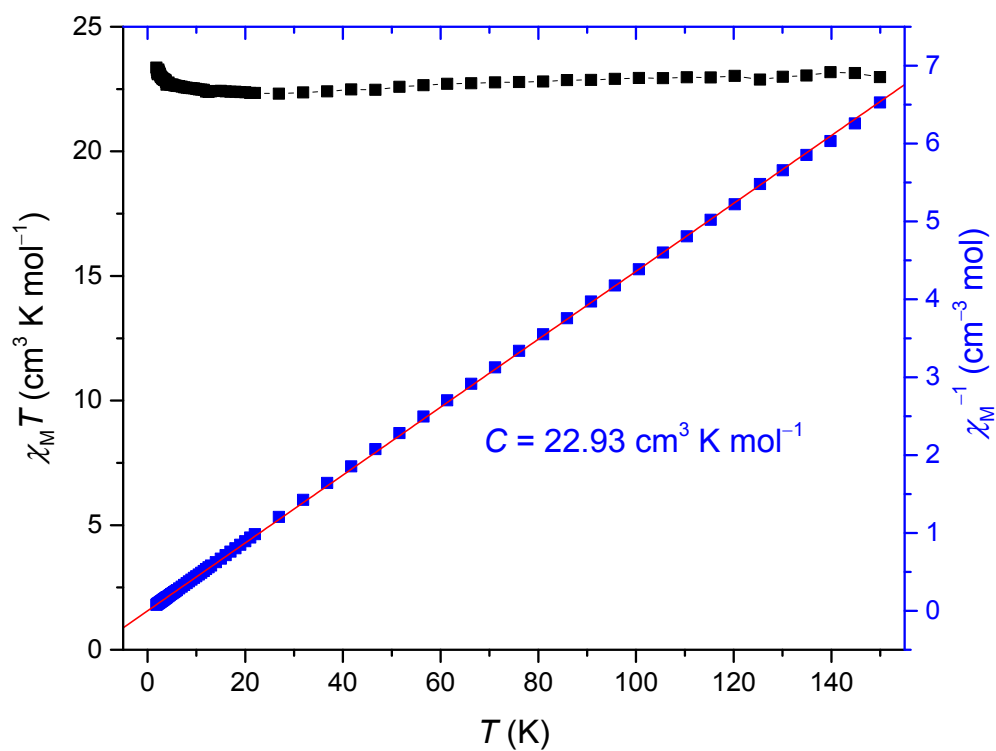

**Figure S23.**  $\chi_M T$  vs  $T$  and  $\chi_M^{-1}$  vs  $T$  plots for  $[\text{Tb}_2]$  in the frozen solution of  $\text{CH}_2\text{Cl}_2$  at 1000 Oe dc magnetic field. Measurements were performed below a melting point of  $\text{CH}_2\text{Cl}_2$  (175.7 K) Solid line in the  $\chi_M^{-1}$  vs  $T$  plots were fitted using the Curie equation for  $T > 100$  K.

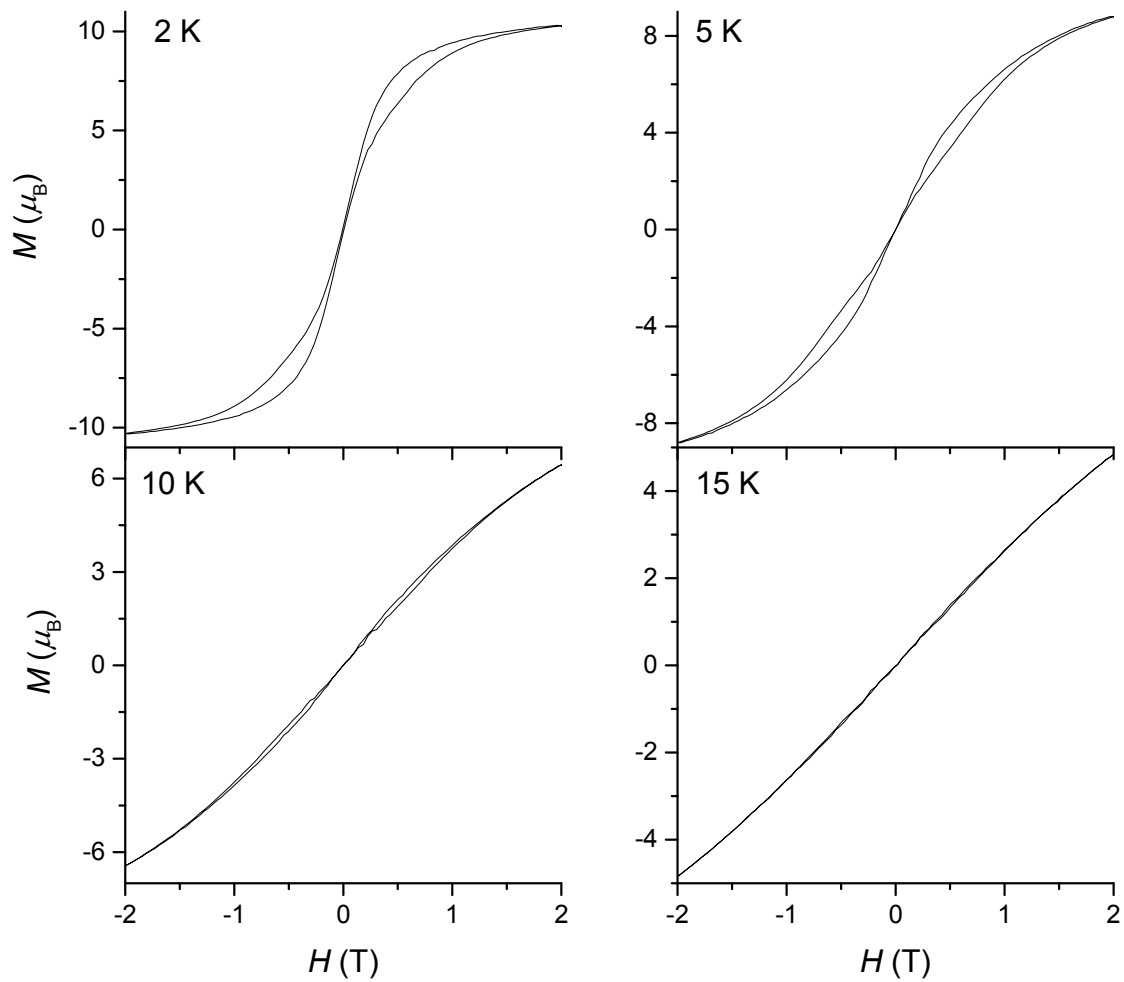

**Figure S24.** *MH* curves for [Tb<sub>2</sub>] at a field sweep rate of 15 Oe/s.

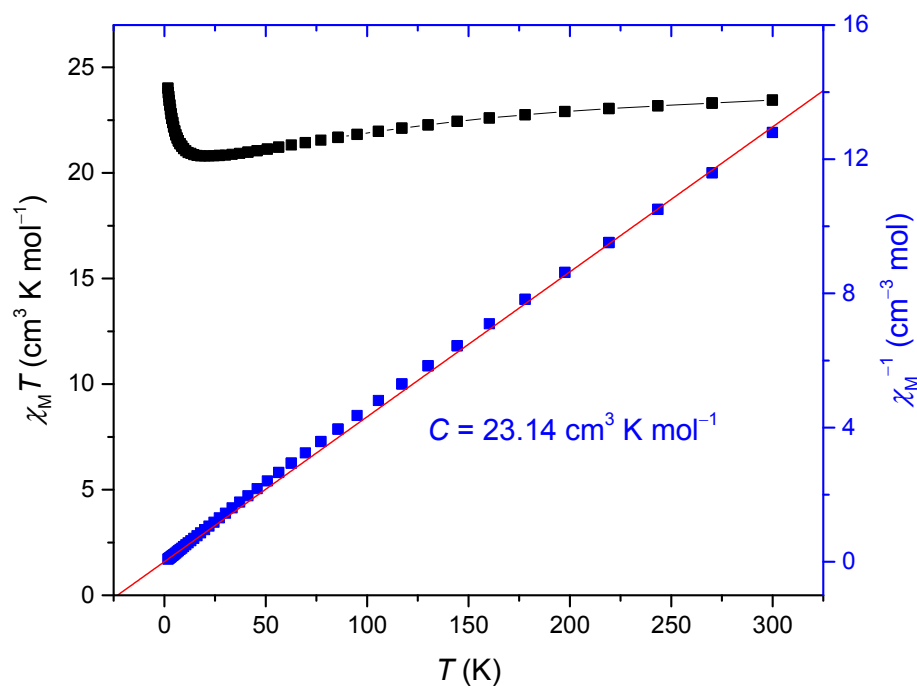

**Figure S25.**  $\chi_M T$  vs  $T$  and  $\chi_M^{-1}$  vs  $T$  plots for  $[\text{Tb}_2\text{Cd}]$  in a 1000 Oe dc magnetic field. Solid line in the  $\chi_M^{-1}$  vs  $T$  plots were fitted using the Curie equation for  $T > 150$  K.

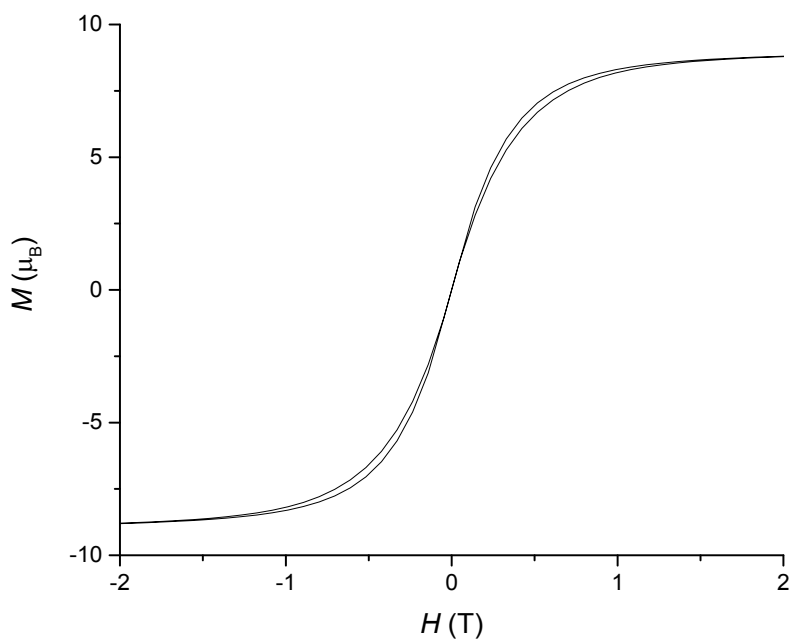

**Figure S26.**  $MH$  curves for  $[\text{Tb}_2\text{Cd}]$  at 2 K and a field sweep rate of 15 Oe/s.

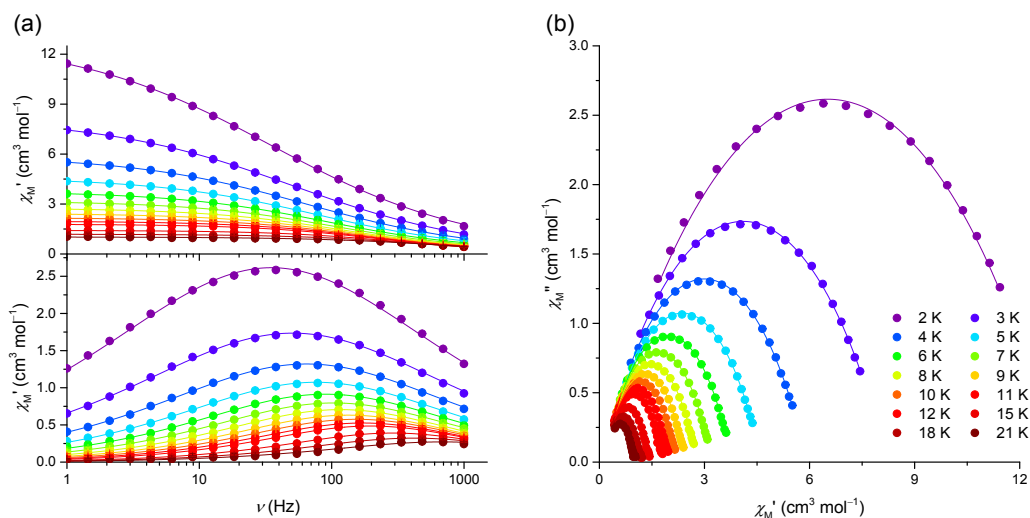

**Figure S27.** (a)  $\chi_M'$  vs  $\nu$  and  $\chi_M''$  vs  $\nu$  plots (b) Cole–Cole plots for [Tb<sub>2</sub>Cd] without an applied dc magnetic field. Solid lines were fitted using the Debye model.

**Table S4.** Fitting parameter obtained from Figure S27.

| T (K) | $\chi_s$ (cm <sup>3</sup> mol <sup>-1</sup> ) | dev( $\chi_s$ ) | $\chi_T$ (cm <sup>3</sup> mol <sup>-1</sup> ) | dev( $\chi_T$ ) | $\tau$ (s) | dev( $\tau$ ) | $\alpha$ | dev( $\alpha$ ) |
|-------|-----------------------------------------------|-----------------|-----------------------------------------------|-----------------|------------|---------------|----------|-----------------|
| 2     | 0                                             | 0.05021         | 13.04052                                      | 0.04724         | 0.00454    | 6.40361E-5    | 0.51428  | 0.0037          |
| 3     | 0                                             | 0.02197         | 8.21106                                       | 0.01645         | 0.00314    | 2.8152E-5     | 0.49091  | 0.00241         |
| 4     | 0.07001                                       | 0.0179          | 5.92308                                       | 0.01152         | 0.00246    | 2.39922E-5    | 0.46049  | 0.0027          |
| 5     | 0.13532                                       | 0.01223         | 4.61359                                       | 0.0071          | 0.00208    | 1.73672E-5    | 0.43046  | 0.0024          |
| 6     | 0.1384                                        | 0.01402         | 3.77231                                       | 0.00735         | 0.00177    | 2.00092E-5    | 0.40686  | 0.00335         |
| 7     | 0.14458                                       | 0.01102         | 3.19303                                       | 0.00531         | 0.00154    | 1.57497E-5    | 0.38739  | 0.00309         |
| 8     | 0.16004                                       | 0.01306         | 2.7632                                        | 0.00585         | 0.00136    | 1.8733E-5     | 0.36696  | 0.00426         |
| 9     | 0.16705                                       | 0.01286         | 2.43967                                       | 0.0053          | 0.00119    | 1.79543E-5    | 0.35402  | 0.00468         |
| 10    | 0.14961                                       | 0.01424         | 2.18284                                       | 0.00537         | 0.00104    | 1.8853E-5     | 0.34367  | 0.0056          |
| 11    | 0.15962                                       | 0.01618         | 1.97271                                       | 0.00569         | 9.25571E-4 | 2.08657E-5    | 0.33062  | 0.00699         |
| 12    | 0.15033                                       | 0.02024         | 1.79454                                       | 0.00652         | 8.11613E-4 | 2.46299E-5    | 0.32102  | 0.00932         |
| 15    | 0.12545                                       | 0.02854         | 1.42054                                       | 0.0071          | 5.51366E-4 | 2.85613E-5    | 0.30874  | 0.01478         |
| 18    | 0.10059                                       | 0.03167         | 1.19084                                       | 0.00576         | 3.81884E-4 | 2.62947E-5    | 0.31994  | 0.0164          |
| 21    | 0.04126                                       | 0.06326         | 1.0226                                        | 0.00744         | 2.31028E-4 | 3.72848E-5    | 0.35591  | 0.02795         |



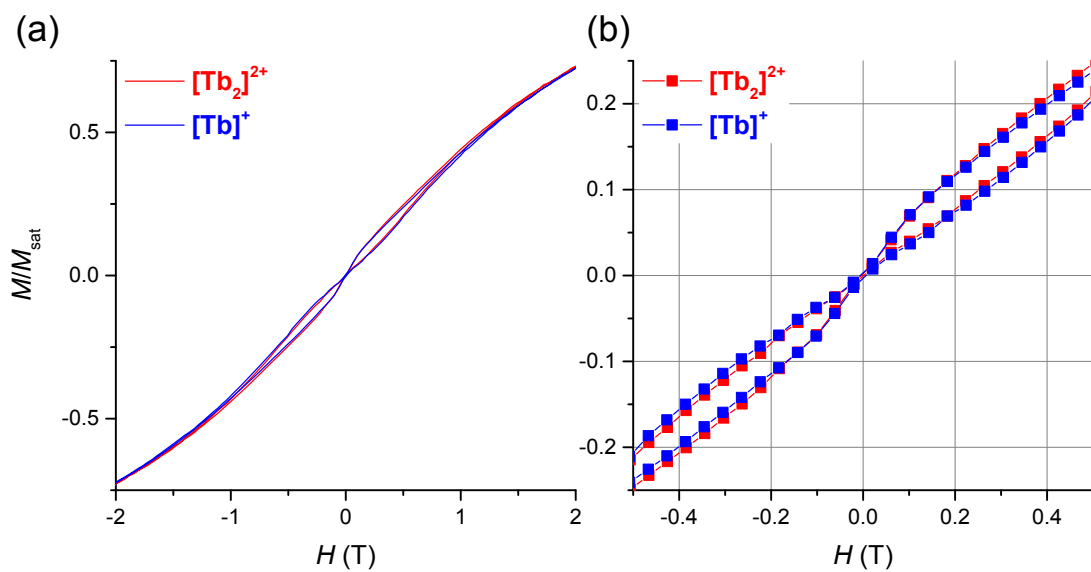

**Figure S28.** (a) Comparison of  $MH$  curves for  $[\text{Tb}_2]^{2+}$  and  $[\text{Tb}]^{+}$  at 10 K. (b) Enlarged view. There are no obvious differences between the plots.

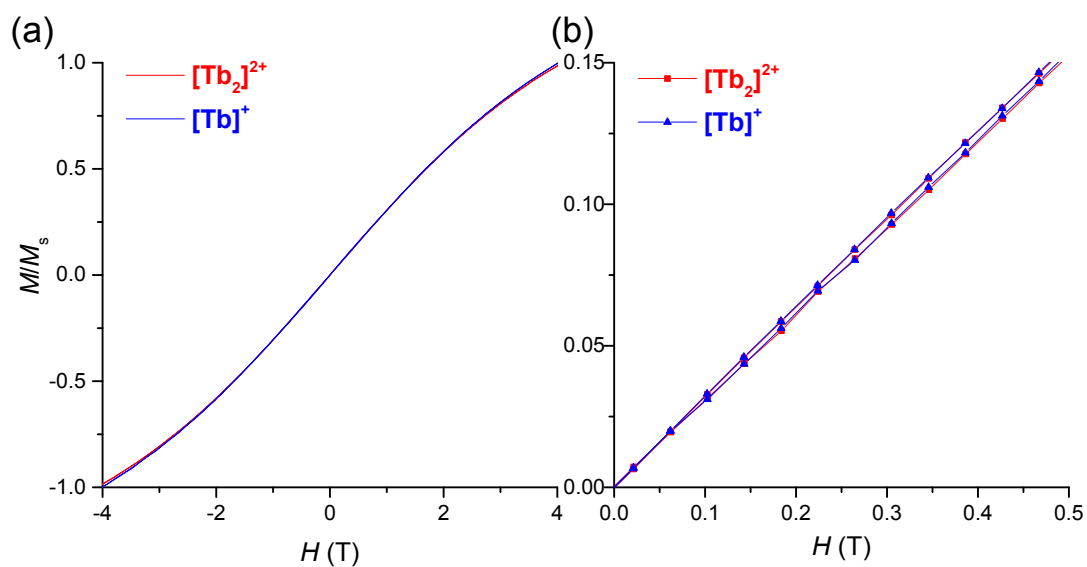

**Figure S29.** (a) Comparison of  $MH$  curves for  $[\text{Tb}_2]^{2+}$  and  $[\text{Tb}]^{+}$  at 20 K. (b) Enlarged view. There are no obvious differences between the two plots.

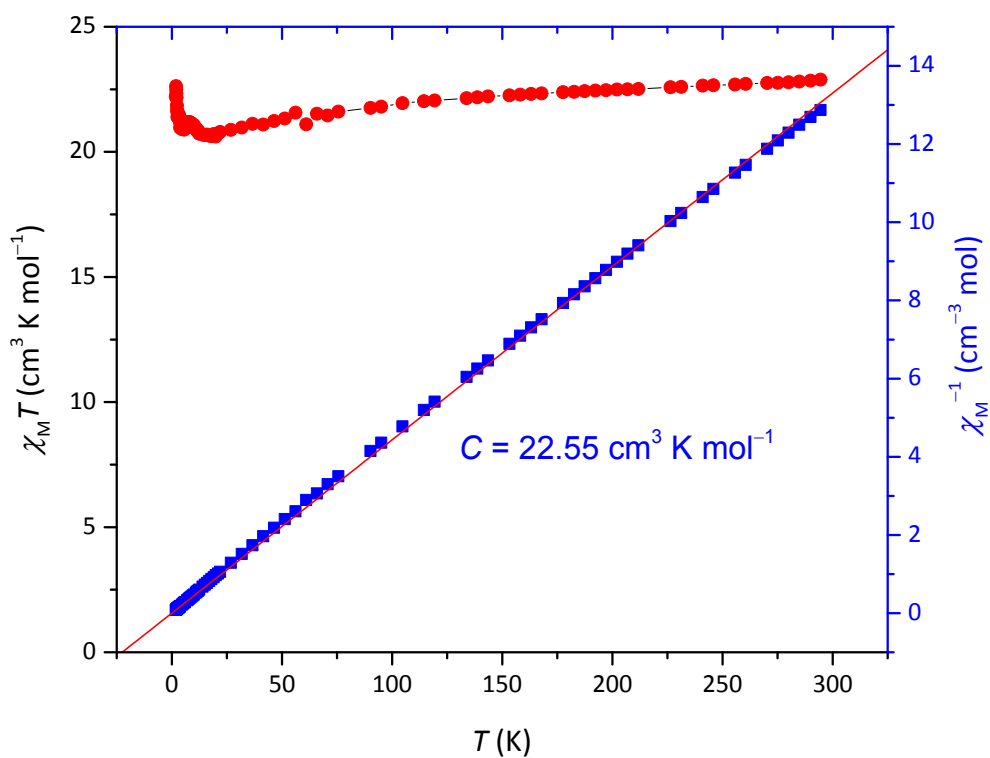

**Figure S30.**  $\chi_M T$  vs  $T$  and  $\chi_M^{-1}$  vs  $T$  plots for  $[\text{Tb}_2]^{2+*}$  in a 1000 Oe dc magnetic field. Solid lines in the  $\chi_M^{-1}$  vs  $T$  plots were fitted using the Curie equation for  $T > 200$  K. The Curie constant is smaller than the expected value ( $C = 23.262 \text{ cm}^3 \text{ K mol}^{-1}$  for 2 mole of Tb(III)) due to the magnetic dilution.

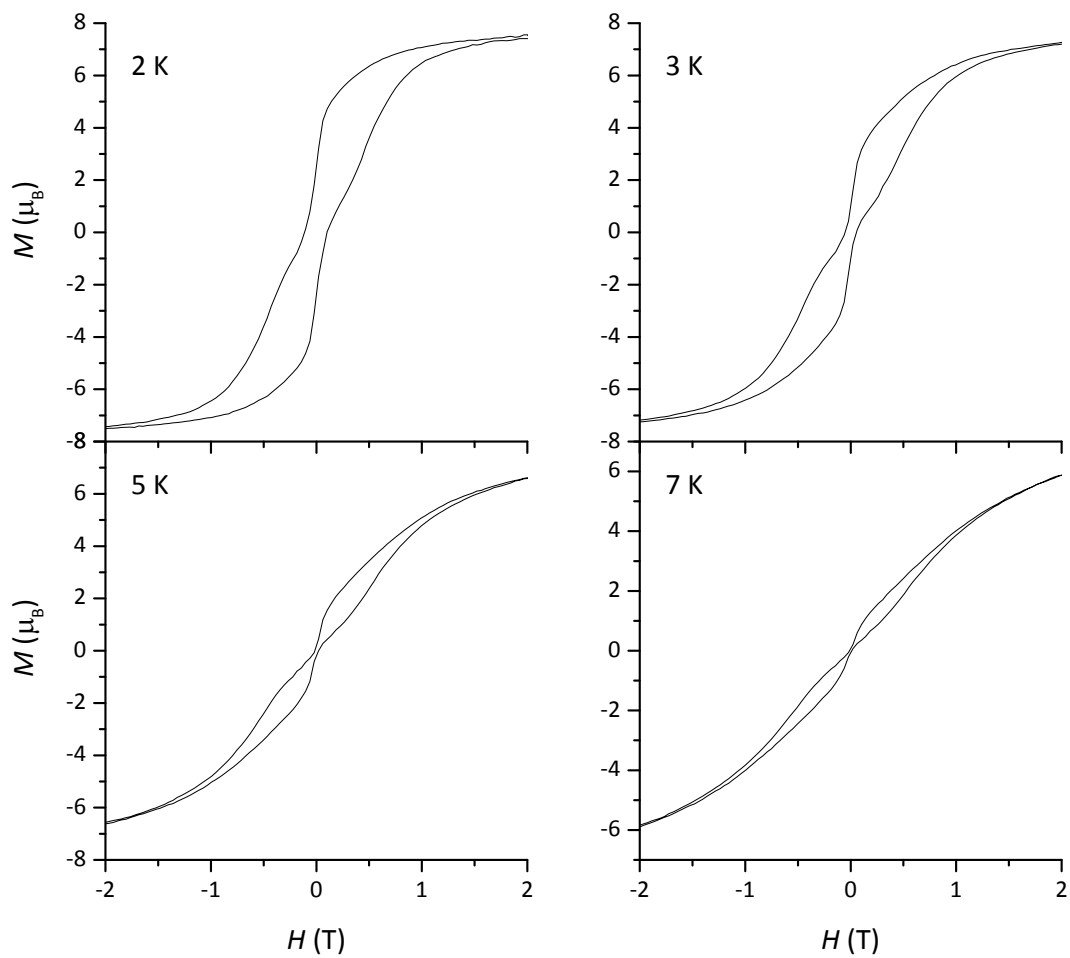

**Figure S31** *MH* curves for  $[\text{Tb}_2]^{2+*}$  at 2 K and a field sweep rate of 15 Oe/s.

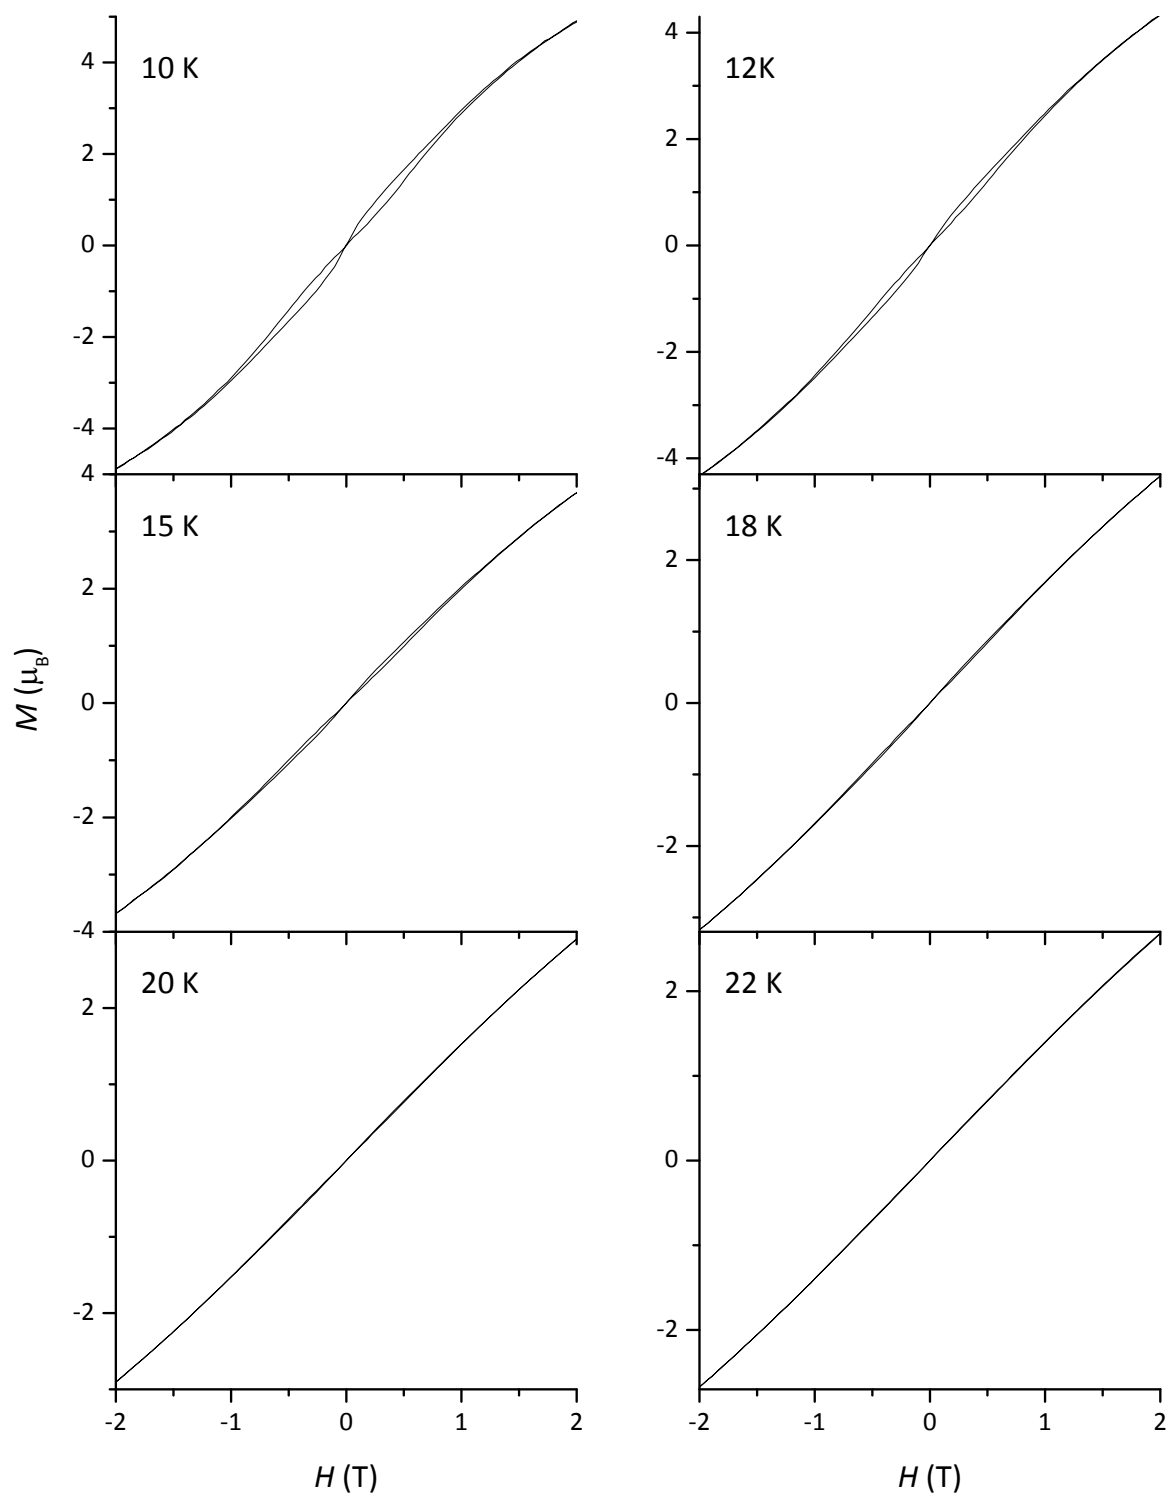

**Figure S32.**  $MH$  curves for  $[\text{Tb}_2]^{2+*}$  at 2 K and a field sweep rate of 15 Oe/s.

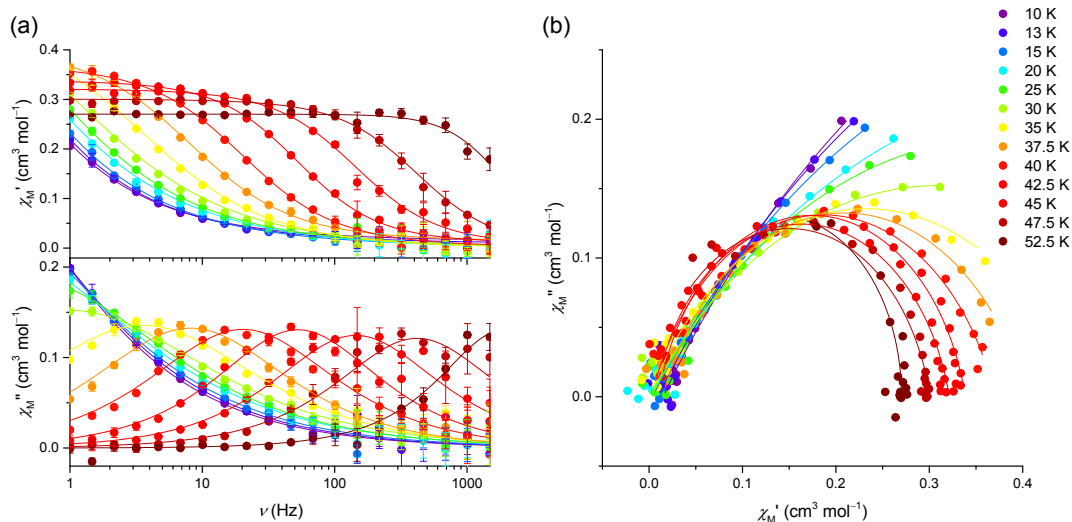

**Figure S33.** (a)  $\chi_M'$  vs  $\nu$  and  $\chi_M''$  vs  $\nu$  plots (b) Cole–Cole plots for  $[Tb_2]^{2+*}$  without an applied dc magnetic field. Solid lines were fitted using the Debye model.

**Table S5.** Fitting parameter obtained from Figure S33.

| $T$ (K) | $\chi_s$ (cm <sup>3</sup> mol <sup>-1</sup> ) | dev( $\chi_s$ ) | $\chi_\tau$ (cm <sup>3</sup> mol <sup>-1</sup> ) | dev( $\chi_\tau$ ) | $\tau$ (s) | dev( $\tau$ ) | $\alpha$ | dev( $\alpha$ ) |
|---------|-----------------------------------------------|-----------------|--------------------------------------------------|--------------------|------------|---------------|----------|-----------------|
| 10      | 0.0012                                        | 1.45717         | 0.13374                                          | 1.93183            | 0.39556    | 0.39845       | 0.00833  | 0.0012          |
| 13      | 9.17289E-4                                    | 1.10031         | 0.08819                                          | 0.99292            | 0.18559    | 0.38309       | 0.00974  | 9.17289E-4      |
| 15      | 9.583E-4                                      | 1.11591         | 0.1054                                           | 1.02503            | 0.2407     | 0.40691       | 0.01115  | 9.583E-4        |
| 20      | 0.00236                                       | 0.90043         | 0.06741                                          | 0.59982            | 0.11646    | 0.42617       | 0.01351  | 0.00236         |
| 25      | 0.00208                                       | 0.92199         | 0.10643                                          | 0.56892            | 0.17081    | 0.43945       | 0.0158   | 0.00208         |
| 30      | 0.00243                                       | 0.59656         | 0.01433                                          | 0.14924            | 0.0096     | 0.40167       | 0.01078  | 0.00243         |
| 35      | 0.00351                                       | 0.43937         | 0.00405                                          | 0.03981            | 9.42218E-4 | 0.295         | 0.01358  | 0.00351         |
| 37.5    | 0.00277                                       | 0.40193         | 0.00462                                          | 0.02201            | 3.4703E-4  | 0.19776       | 0.01303  | 0.00277         |
| 40      | 0.00468                                       | 0.35794         | 0.00178                                          | 0.00889            | 2.39482E-4 | 0.13818       | 0.01055  | 0.00468         |
| 42.5    | 0.004                                         | 0.34057         | 0.00166                                          | 0.00321            | 6.94596E-5 | 0.12252       | 0.00959  | 0.004           |
| 45      | 0.00657                                       | 0.31595         | 0.00125                                          | 9.69328E-4         | 3.93095E-5 | 0.12435       | 0.01421  | 0.00657         |
| 47.5    | 0.00434                                       | 0.30029         | 4.49195E-4                                       | 4.62052E-4         | 1.45272E-5 | 0.08991       | 0.01551  | 0.00434         |
| 52.5    | 0.04613                                       | 0.26931         | 7.60788E-4                                       | 8.95634E-5         | 2.33285E-5 | 0             | 0.03641  | 0.04613         |

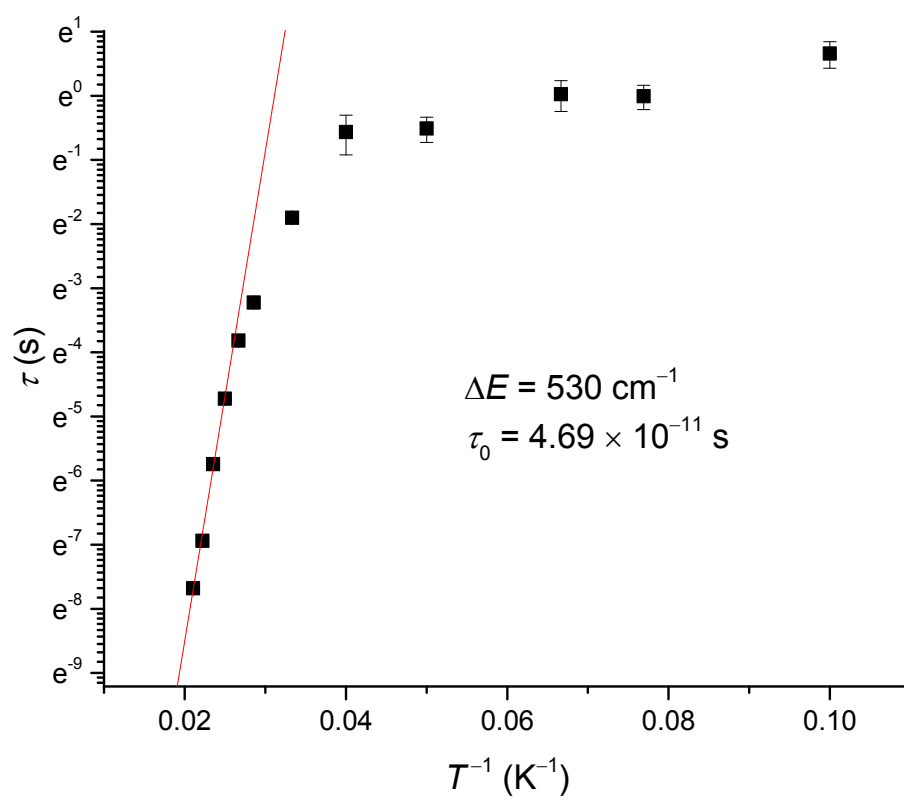

**Figure S34.** Arrhenius plots for  $[\text{Tb}_2]^{2+*}$ . Solid line was fitted by using the Arrhenius equation:  $\tau = \tau_0 \exp(\Delta E/k_B T)$ . Fitting the plots by using eq.1 was unsuccessful due to a large deviation in  $\tau$  in the low- $T$  region.

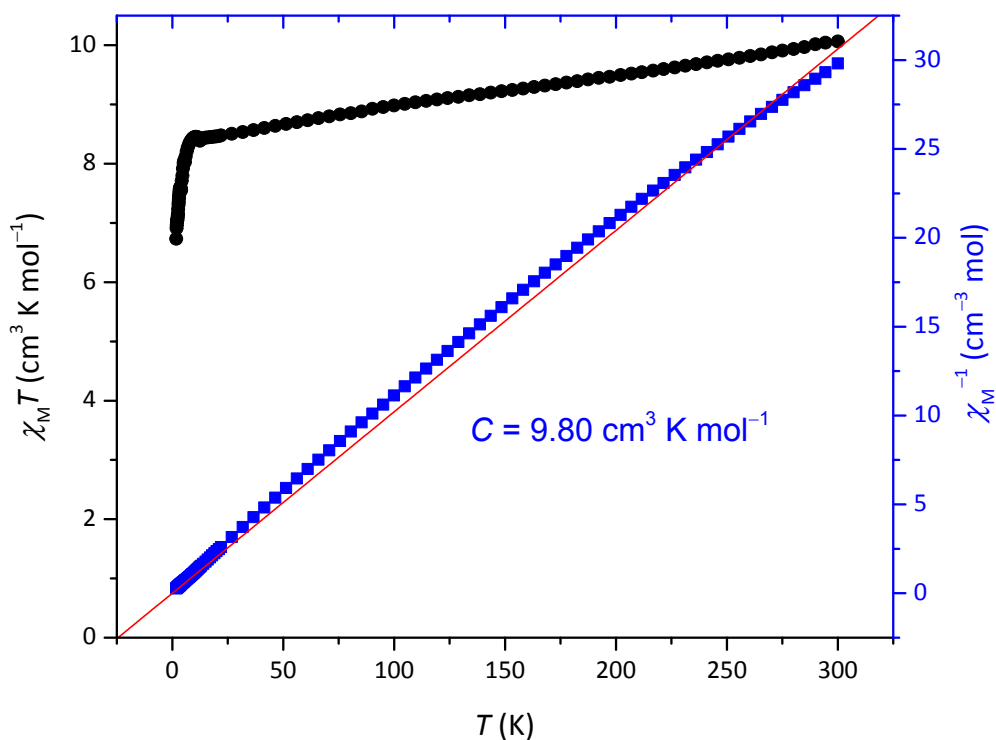

**Figure S35.**  $\chi_M T$  vs  $T$  and  $\chi_M^{-1}$  vs  $T$  plots for  $[\text{Tb}]^{2+}$  in a 1000 Oe dc magnetic field. Solid lines in the  $\chi_M^{-1}$  vs  $T$  plots were fitted using the Curie equation for  $T > 200$  K. The Curie constant is smaller than expected value ( $C = 11.813 \text{ cm}^3 \text{ K mol}^{-1}$  for 1 mole of Tb(III)) due to the deviation which originate from magnetic dilution.

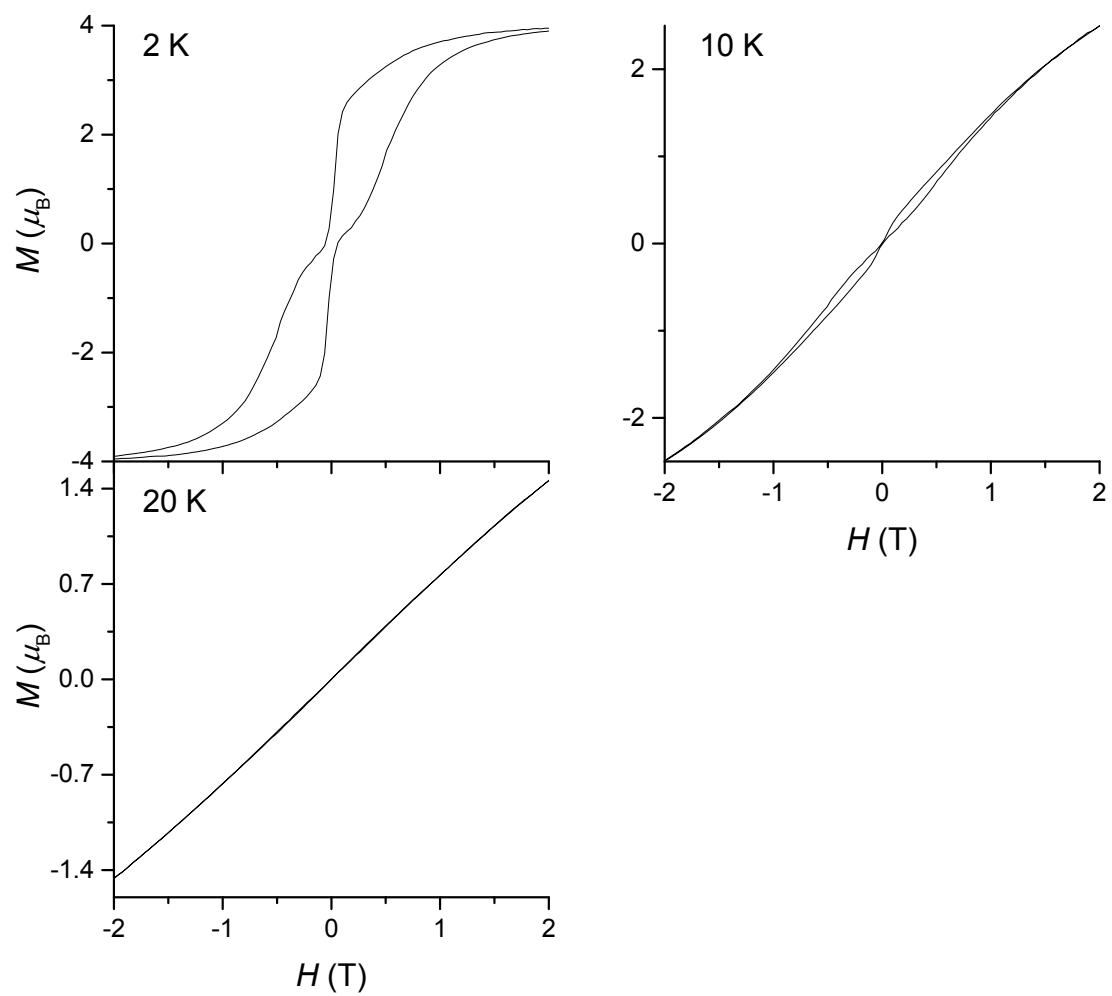

**Figure S36.**  $MH$  curves for  $[Tb]^{**}$  at 2 K and a field sweep rate of 15 Oe/s.



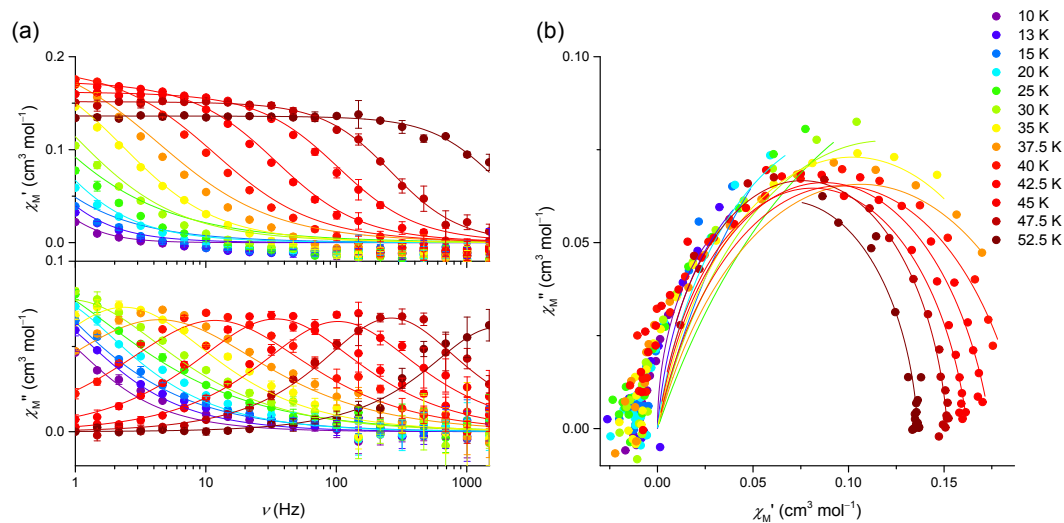

**Figure S37.** (a)  $\chi_M'$  vs  $\nu$  and  $\chi_M''$  vs  $\nu$  plots (b) Cole-Cole plots for  $[\text{Tb}]^{+*}$  without an applied dc magnetic field. Solid lines were fitted using the Debye model.

**Table S6.** Fitting parameter obtained from Figure S37.

| $T$ (K) | $\chi_s$ ( $\text{cm}^3 \text{mol}^{-1}$ ) | $\text{dev}(\chi_s)$ | $\chi_T$ ( $\text{cm}^3 \text{mol}^{-1}$ ) | $\text{dev}(\chi_T)$ | $\tau$ (s) | $\text{dev}(\tau)$ | $\alpha$ | $\text{dev}(\alpha)$ |
|---------|--------------------------------------------|----------------------|--------------------------------------------|----------------------|------------|--------------------|----------|----------------------|
| 10      | 0                                          | 0.00187              | 0.12244                                    | 0.06613              | 0.31329    | 0.21377            | 0        | 0.13866              |
| 13      | 0                                          | 0.00237              | 0.16259                                    | 0.08353              | 0.32683    | 0.24793            | 0.09349  | 0.13048              |
| 15      | 0                                          | 0.00311              | 0.32655                                    | 0.33381              | 0.88807    | 1.67925            | 0.26693  | 0.13418              |
| 20      | 0                                          | 0.00253              | 0.20894                                    | 0.06757              | 0.28218    | 0.15431            | 0.16642  | 0.09191              |
| 25      | 0                                          | 0.0054               | 0.34864                                    | 0.24717              | 0.57052    | 0.95772            | 0.37135  | 0.12909              |
| 30      | 0                                          | 0.00329              | 0.2383                                     | 0.04662              | 0.17302    | 0.07053            | 0.26662  | 0.07229              |
| 35      | 0                                          | 0.00283              | 0.20426                                    | 0.01545              | 0.06735    | 0.00994            | 0.20987  | 0.04771              |
| 37.5    | 0                                          | 0.00461              | 0.21295                                    | 0.01673              | 0.03626    | 0.00675            | 0.29616  | 0.05736              |
| 40      | 0                                          | 0.00359              | 0.19139                                    | 0.00669              | 0.01355    | 0.0012             | 0.2378   | 0.03809              |
| 42.5    | 0                                          | 0.00281              | 0.17436                                    | 0.00296              | 0.00459    | 2.38127E-4         | 0.17355  | 0.02597              |
| 45      | 0                                          | 0.00337              | 0.16227                                    | 0.00212              | 0.00154    | 7.75421E-5         | 0.14336  | 0.02612              |
| 47.5    | 0                                          | 0.00236              | 0.1517                                     | 9.32205E-4           | 6.01633E-4 | 1.69583E-5         | 0.08185  | 0.01556              |
| 52.5    | 0                                          | 0.016                | 0.13623                                    | 0.0011               | 9.36351E-5 | 1.58134E-5         | 0.06821  | 0.04719              |

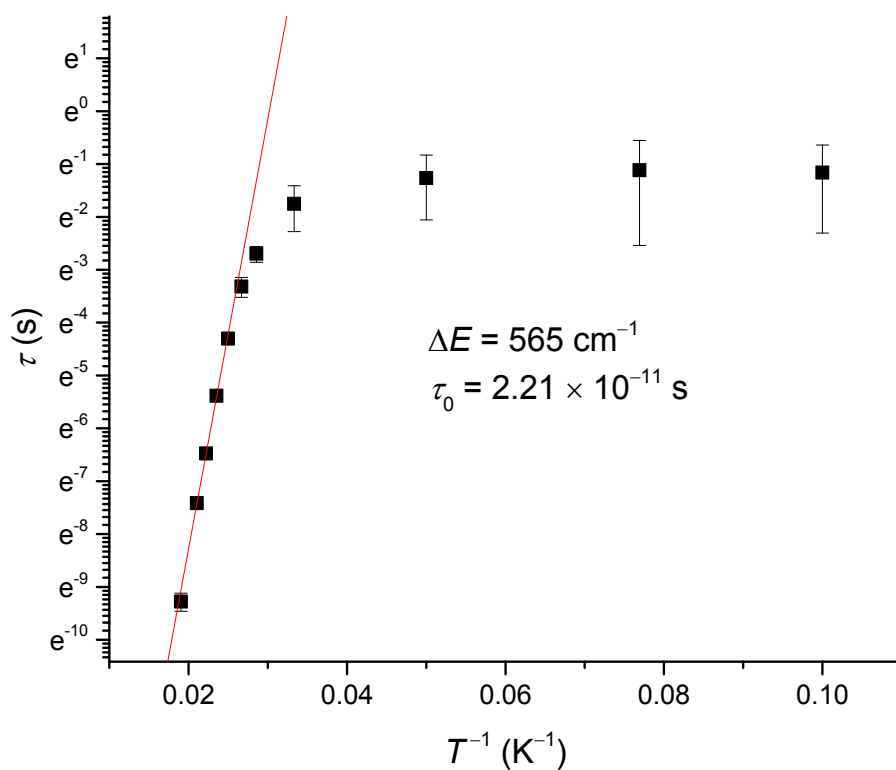

**Figure S38.** Arrhenius plot for  $[\text{Tb}_2]^{+*}$ . Solid line was fitted by using the Arrhenius equation:  $\tau = \tau_0 \exp(\Delta E/k_B T)$ . Fitting the plots by using eq.1 was unsuccessful due to a large deviation in  $\tau$  in the low- $T$  region.

## References

- 1 A. Y. Tolbin, V. E. Pushkarev, L. G. Tomilova and N. S. Zefirov, *Mendeleev Commun.* **2009**, *19*, 78–80.
- 2 G. A. Spyroulias, C. P. Raptopoulou, D. de Montauzon, A. Mari, R. Poilblanc, A. Terzis and A. G. Coutsolelos, *Inorg. Chem.* **1999**, *38*, 1683–1696.
- 3 A. Y. Tolbin, V. Pushkarev, L. Tomilova and N. Zefirov, *Russ. Chem. Bull.* **2006**, *55*, 1155–1158.
- 4 L. Malavolti, M. Mannini, P.-E. Car, G. Campo, F. Pineider and R. Sessoli, *J. Mater. Chem. C* **2013**, *1*, 2935–2942.
